# Supplementary material for: Synthesis and biological evaluation of new pyranopyridine derivatives catalyzed by guanidinium chloride-functionalized γ-Fe2O3/HAp magnetic nanoparticles
Source: Royal Society of Chemistry journal article supplement (doi:10.1039/c6ra15781e), 2016-01-01
Supplement: c6ra15781e1.pdf [file c6ra15781e1.pdf]

Electronic Supplementary Information (ESI)

**Synthesis and Biological Evaluation of New Pyranopyridine  
Derivatives Catalyzed by Guanidinium Chloride-Functionalized  $\gamma$ -  
 $\text{Fe}_2\text{O}_3/\text{HAP}$  Magnetic Nanoparticles†**

Davood Azarifar<sup>a\*</sup>, Masoumeh Ghaemi<sup>a</sup>, Maryam Golbaghi<sup>a</sup>, Roya Karamian<sup>b</sup>, Mostafa  
Asadbegy<sup>b</sup>

Department of Chemistry, Bu-Ali Sina University, Zip Code 65178, Hamedan, Iran

Department of Biology, Faculty of Science, Bu-Ali Sina University, P. O. Box 65175/4161,  
Hamedan, Iran

| <i>Table of Contents</i>                                | <i>Page number</i> |
|---------------------------------------------------------|--------------------|
| <b>A. Characterization data for <math>C_1</math></b>    | <b>1</b>           |
| <b>B. Characterization data for <math>C_2</math></b>    | <b>4</b>           |
| <b>C. Characterization data for <math>C_3</math></b>    | <b>7</b>           |
| <b>D. Characterization data for <math>C_4</math></b>    | <b>10</b>          |
| <b>E. Characterization data for <math>C_5</math></b>    | <b>13</b>          |
| <b>F. Characterization data for <math>C_6</math></b>    | <b>16</b>          |
| <b>G. Characterization data for <math>C_7</math></b>    | <b>19</b>          |
| <b>H. Characterization data for <math>C_8</math></b>    | <b>22</b>          |
| <b>I. Characterization data for <math>C_9</math></b>    | <b>25</b>          |
| <b>K. Characterization data for <math>C_{10}</math></b> | <b>28</b>          |
| <b>L. Characterization data for <math>C_{11}</math></b> | <b>31</b>          |

**A1. 2-Amino-7,8-dihydro-5-methyl-7-oxo-4-(3-bromophenyl)-4H-pyrano[2,3-b]pyridine-3,6-dicarbonitrile(C<sub>1</sub>)(Table 2, Entry 1):**

White solid, mp 140-145 °C; <sup>1</sup>H NMR (400 MHz, DMSO-d<sub>6</sub>): δ = 2.13 (s, 3H, CH<sub>3</sub>), 4.83 (s, 1H, C<sub>4</sub>-H), 7.11–8.11 (m, 6H, Ar-H and NH<sub>2</sub>), 9.54 (s, 1H, NH) ppm; <sup>13</sup>C NMR (100 MHz, CDCl<sub>3</sub>): δ = 17.6, 57.4, 93.2, 114.8, 119.4, 122, 126.2, 128.9, 129.7, 130.0, 131.2, 131.5, 132.8, 136.5, 146.8, 159.0 ppm; IR (KBr) (ν<sub>max</sub>/cm<sup>-1</sup>): 3641, 3488, 3355, 2224, 2196, 1683; Anal. Calcd for C<sub>17</sub>H<sub>11</sub>BrN<sub>4</sub>O<sub>2</sub>: C, 53.28; H, 2.89, N, 14.62; %. Found: C, 53.33; H, 2.91; N, 14.63; MS: m/z = 383 (M<sup>+</sup>). (Table 2, Entry 2):

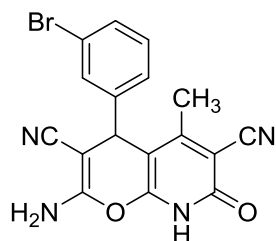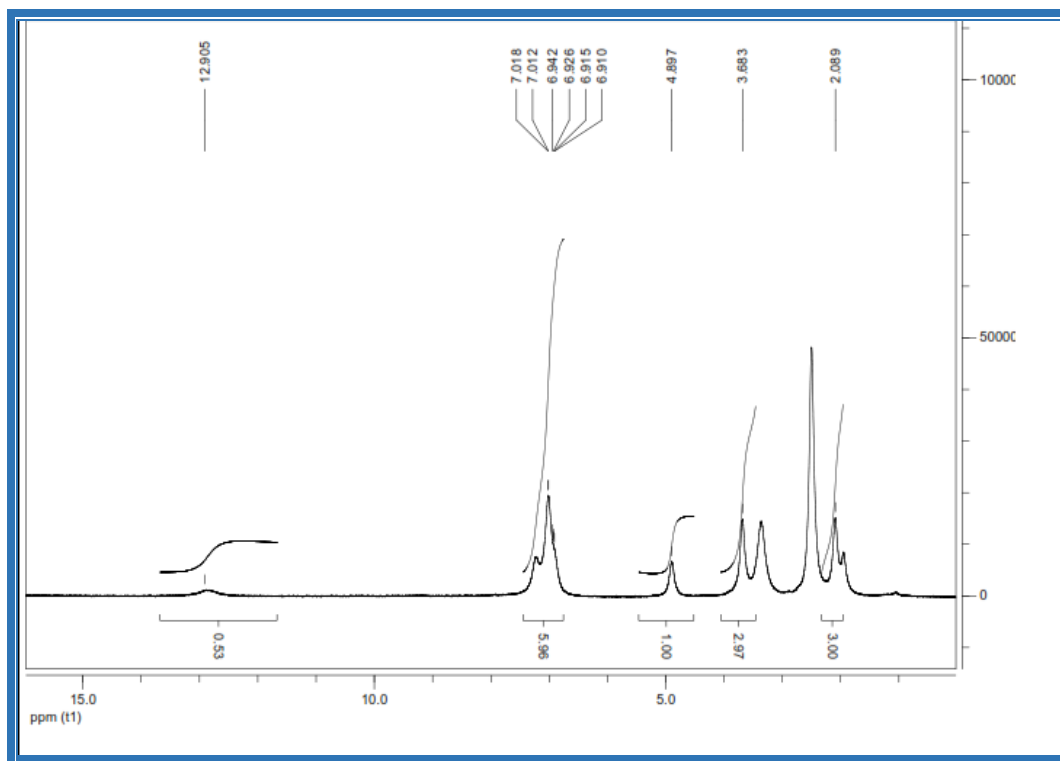

**Fig. A1** The <sup>1</sup>H NMR (500 MHz) spectrum of product (C<sub>1</sub>)

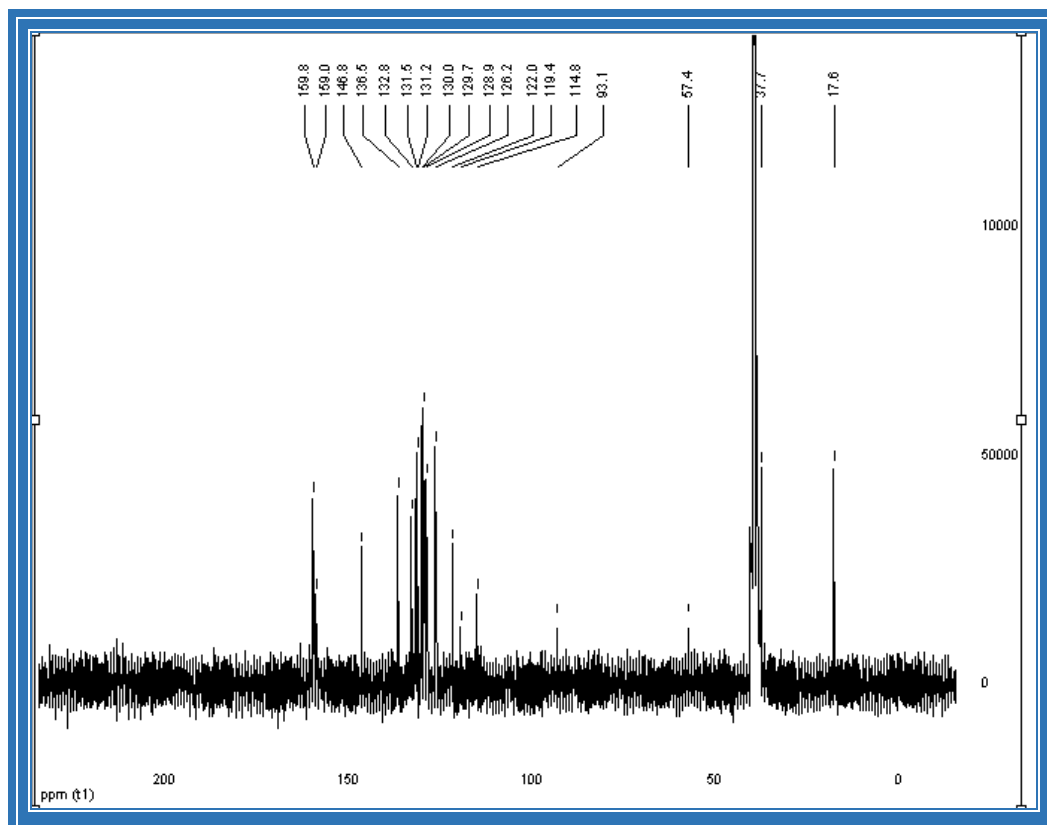

Fig. A2 The  $^{13}\text{C}$  NMR (125 MHz) spectrum of product ( $\text{C}_1$ )

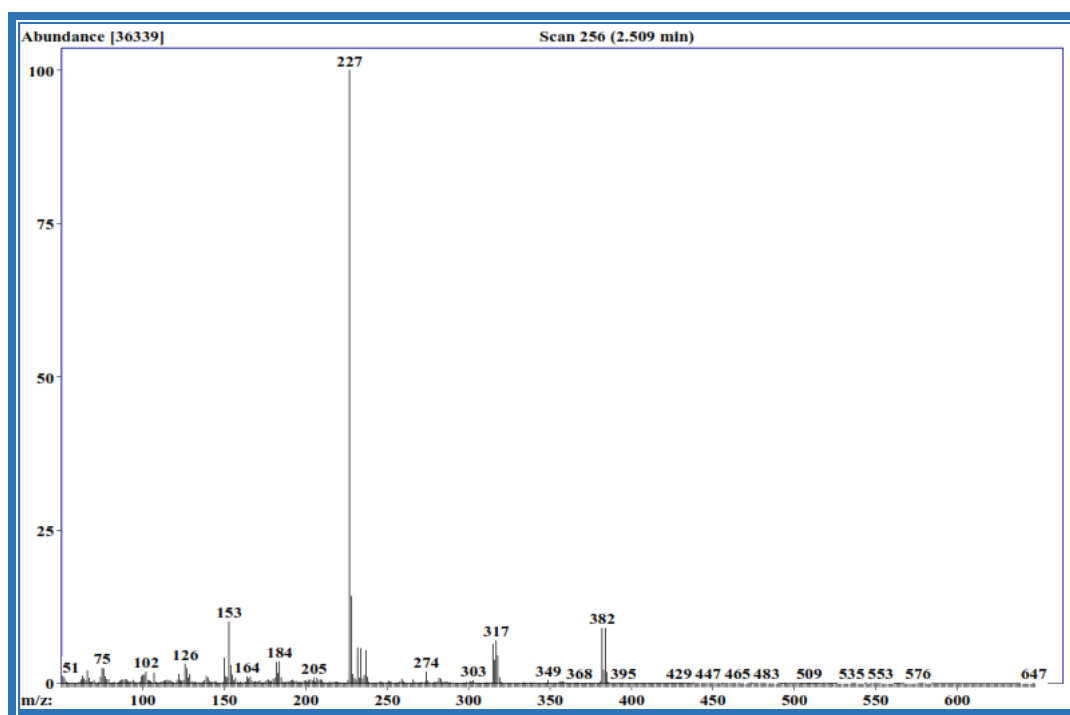

Fig. A3 The MS spectrum of product ( $\text{C}_1$ )

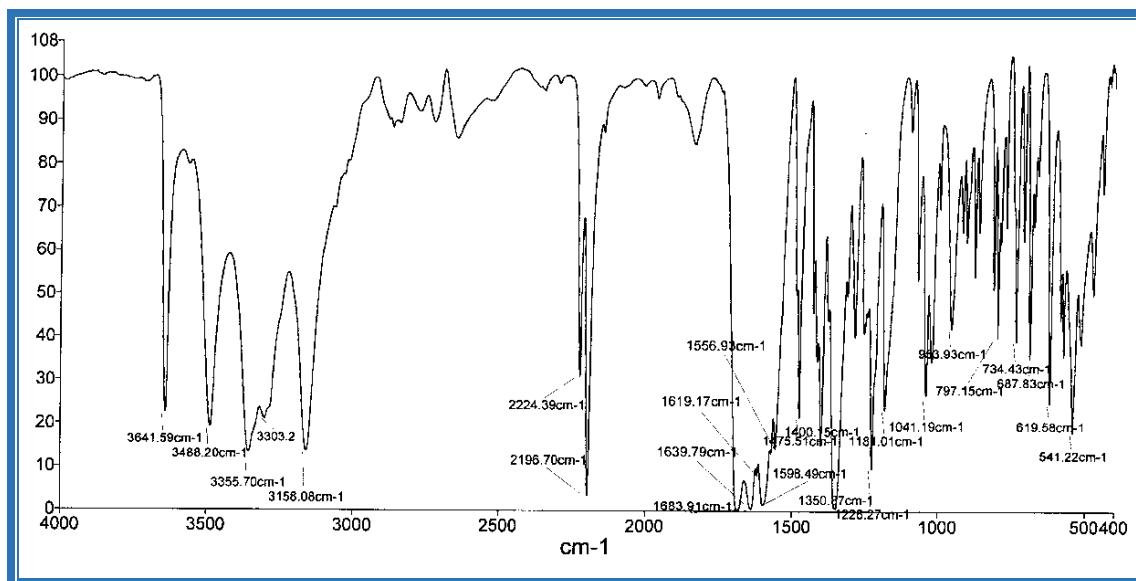

**Fig. A4** The IR spectrum of product (C<sub>1</sub>)

**2-Amino-7,8-dihydro-5-methyl-7-oxo-4-(4-chlorophenyl)-4H-pyrano[2,3-b]pyridine-3,6-dicarbonitrile (C<sub>2</sub>)**

White solid, mp 180-184 °C; <sup>1</sup>H NMR (400 MHz, DMSO-d<sub>6</sub>): δ = 2.11 (s, 3H, CH<sub>3</sub>), 5.02 (s, 1H, C<sub>4</sub>-H), 7.42-8.73 (m, 6H, Ar-H, and NH<sub>2</sub>), 10.17 (s, 1H, NH) ppm; <sup>13</sup>C NMR (100 MHz, CDCl<sub>3</sub>): δ = 17.2, 66.1, 92, 112, 113.2, 114.4, 120.9, 126.8, 131.1, 141.1, 167.1 ppm; IR (KBr) (ν<sub>max</sub>/cm<sup>-1</sup>): 3650, 3504, 3344, 2225, 2200, 1683; Anal. Calcd for C<sub>17</sub>H<sub>11</sub>ClN<sub>4</sub>O<sub>2</sub>: C, 60.28; H, 3.27, N, 16.54; %. Found: C, 60.32; H, 3.29; N, 16.54; MS: m/z = 338 (M<sup>+</sup>). (**Table 2, Entry 2**):

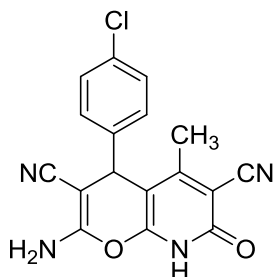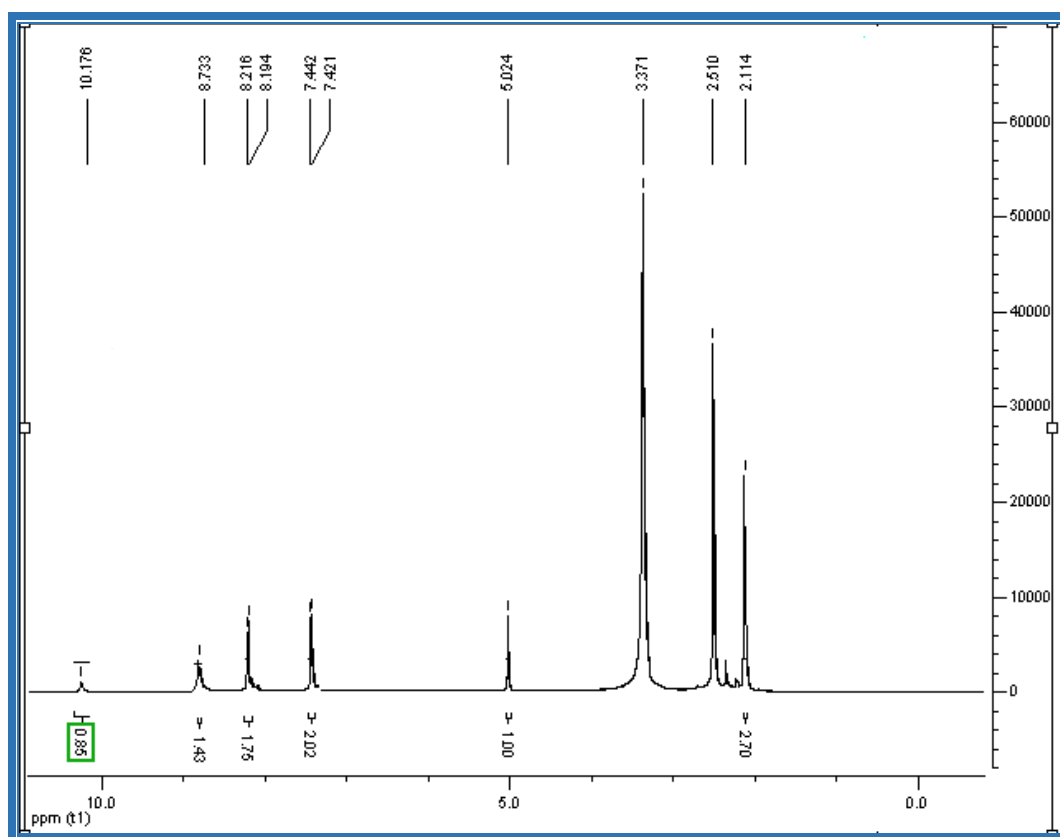

**Fig. B1** The <sup>1</sup>H NMR (500 MHz) spectrum of product (C<sub>2</sub>)

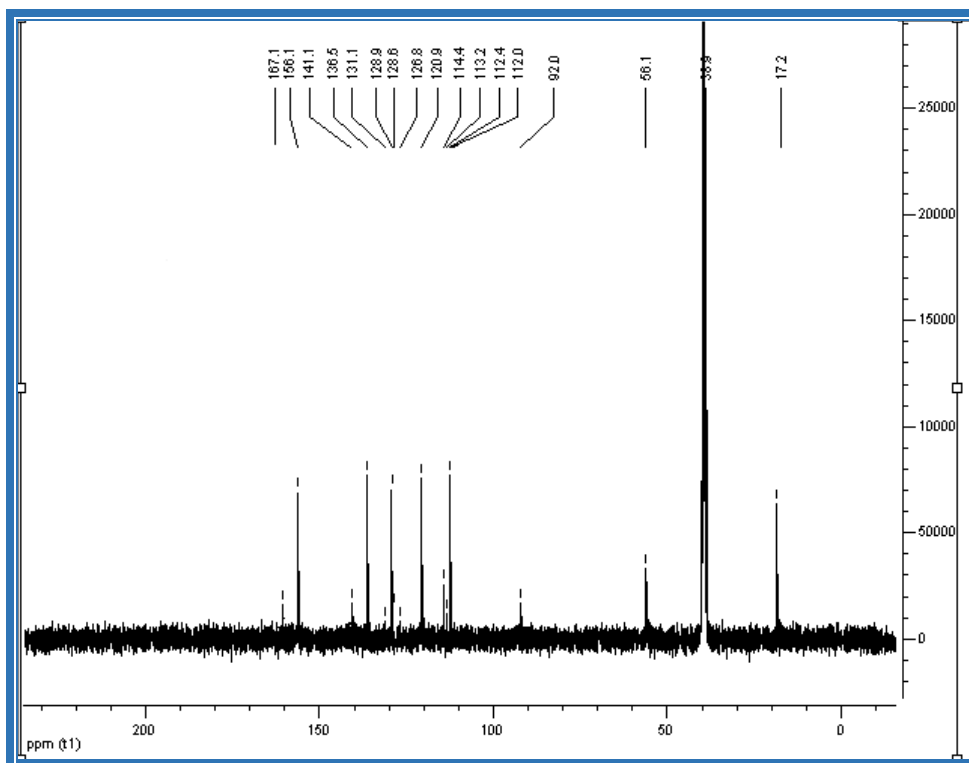

**Fig. B2** The  $^{13}\text{C}$  NMR (125 MHz) spectrum of product ( $\text{C}_2$ )

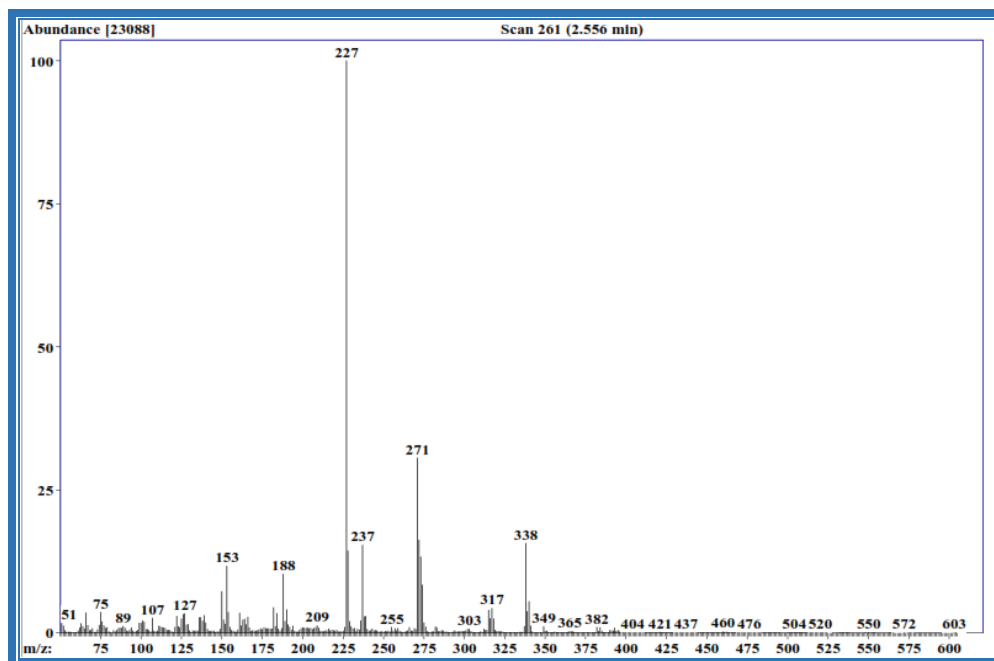

**Fig. B3** The MS spectrum of product ( $\text{C}_2$ )

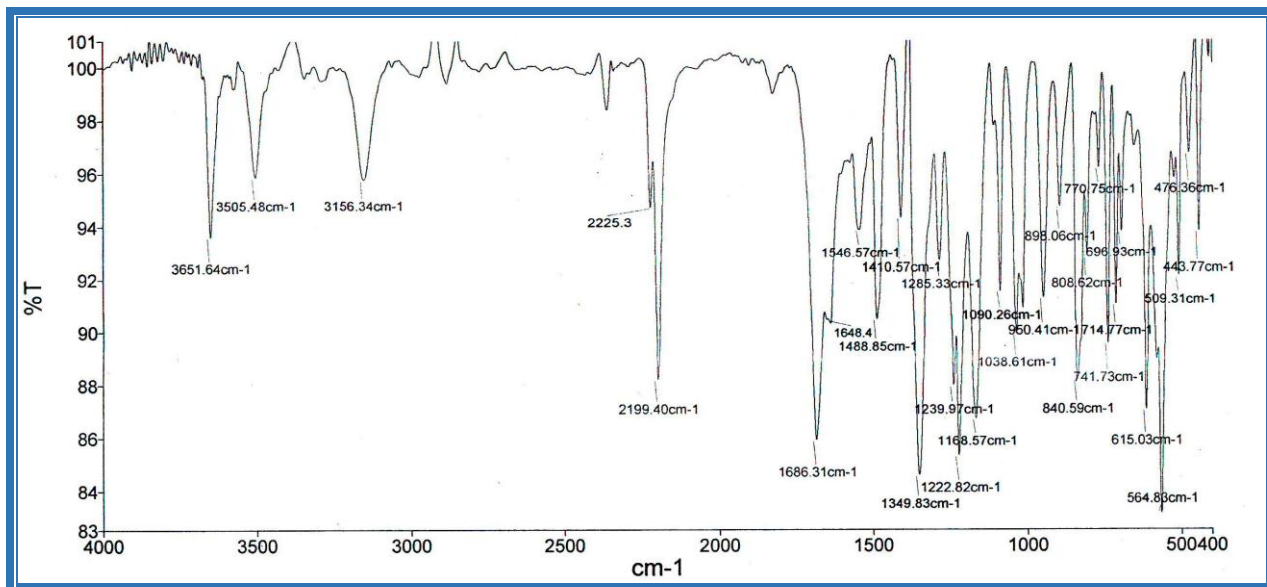

**Fig. B4** The IR spectrum of product (C<sub>2</sub>)

**2-Amino-7,8-dihydro-5-methyl-7-oxo-4-(p-tolyl)-4H-pyrano[2,3-b]pyridine-3,6-dicarbonitrile (C<sub>3</sub>)**

White solid, mp 139-142 °C; <sup>1</sup>H NMR (400 MHz, DMSO-d<sub>6</sub>): δ = 2.20 (s, 3H, CH<sub>3</sub>), 2.26 (s, 3H, CH<sub>3</sub>), 5.52 (s, 1H, C<sub>4</sub>-H), 6.98–8.49 (m, 6H, Ar-H and NH<sub>2</sub>), 9.96 (s, 1H, NH) ppm; <sup>13</sup>C NMR (100 MHz, CDCl<sub>3</sub>): δ = 21.2, 26, 69.6, 92.9, 100.2, 109.7, 126.1, 126.9, 127.6, 127.7, 129.4, 129.7, 130.7, 153.4 ppm; IR (KBr) (ν<sub>max</sub>/cm<sup>-1</sup>): 3640, 3506, 3349, 2224, 2200, 1686; Anal. Calcd for C<sub>18</sub>H<sub>14</sub>N<sub>4</sub>O<sub>2</sub>: C, 67.92; H, 4.43, N, 17.60 %. Found: C, 67.95; H, 4.44; N, 17.65; MS: m/z= 318 (M<sup>+</sup>).

**(Table 2, Entry 3):**

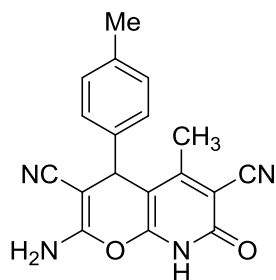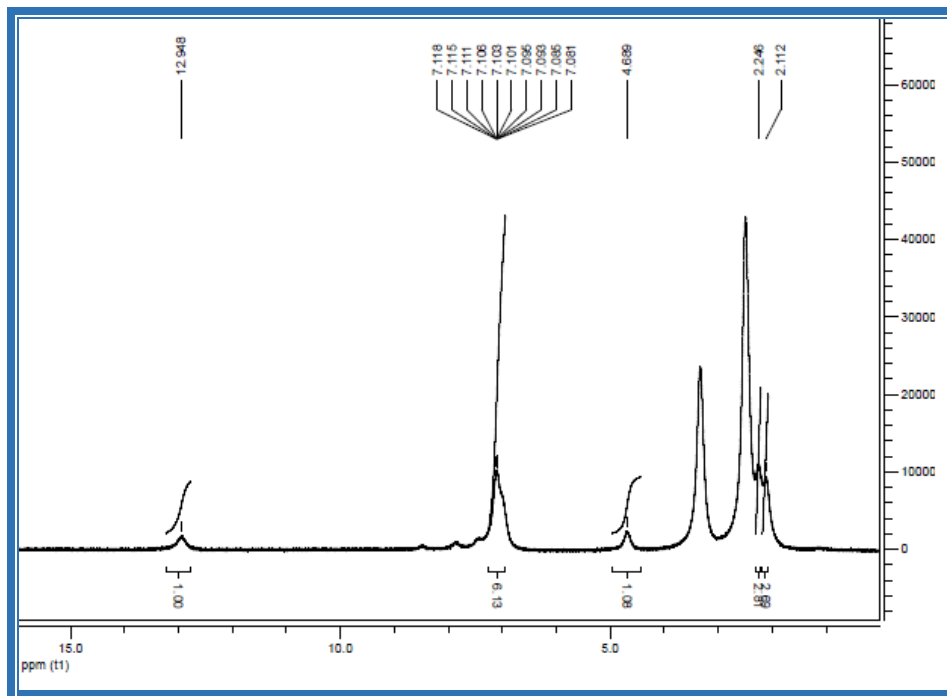

**Fig. C1** The <sup>1</sup>H NMR (500 MHz) spectrum of product (C<sub>3</sub>)



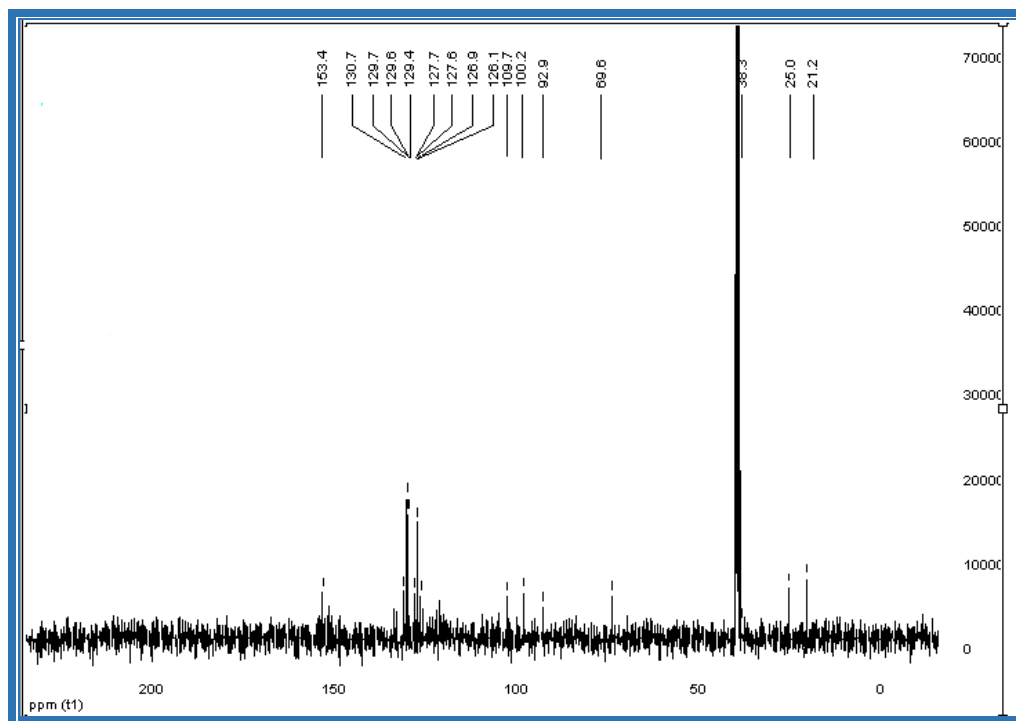

Fig. C2 The  $^{13}\text{C}$  NMR (125 MHz) spectrum of product (C<sub>3</sub>)

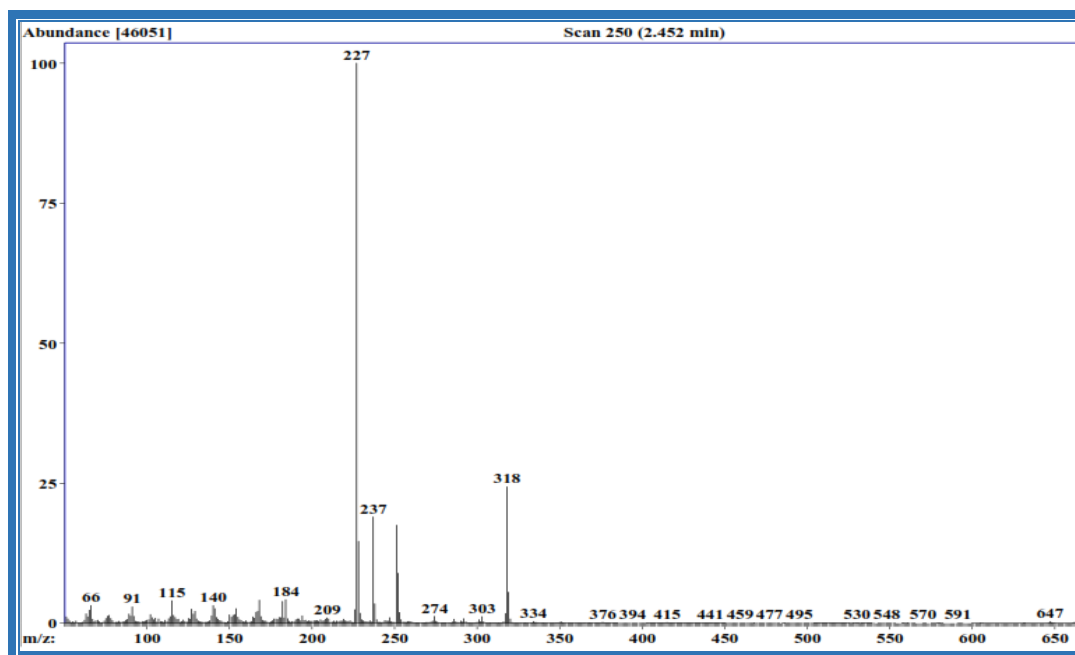

Fig. C3 The MS spectrum of product (C<sub>3</sub>)

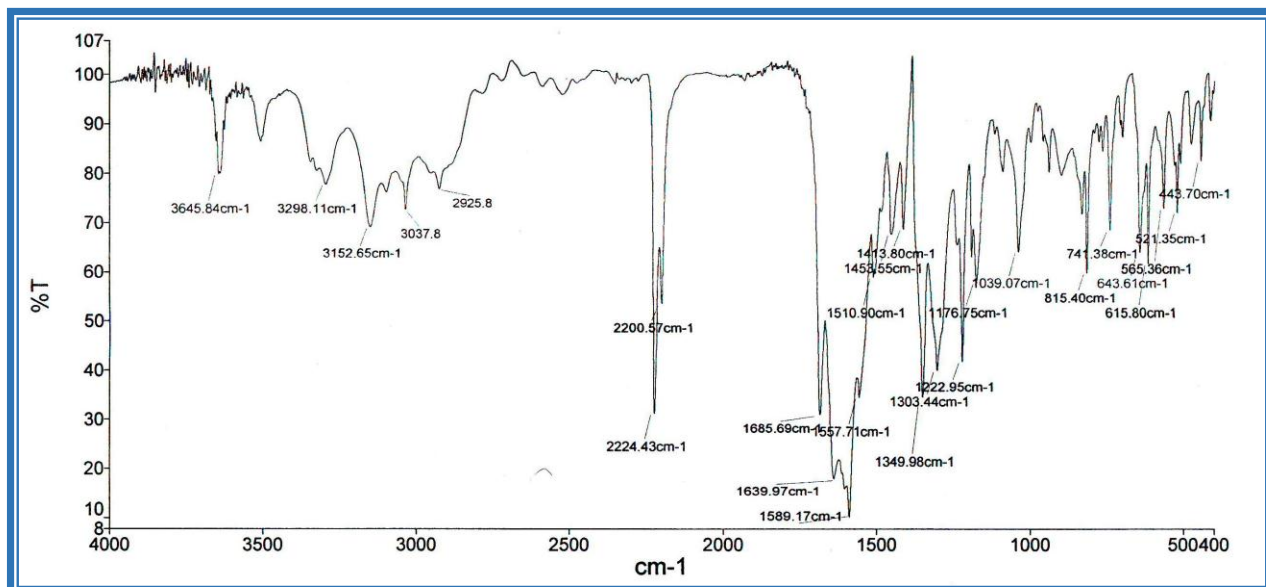

**Fig. C4** The IR spectrum of product (C<sub>3</sub>)

**2-Amino-7,8-dihydro-5-methyl-7o-xo-4-(2-methoxyphenyl)-4H-pyrano[2,3-b]pyridine-3,6-dicarbonitrile (C<sub>4</sub>)**

White solid, mp 216-220 °C; <sup>1</sup>H NMR (400 MHz, DMSO-d<sub>6</sub>): δ = 2.10 (s, 3H, CH<sub>3</sub>), 3.69 (s, 3H, OCH<sub>3</sub>), 4.89 (s, 1H, C<sub>4</sub>-H), 7.01–8.48 (m, 6H, Ar-H and NH<sub>2</sub>), 10.36 (s, 1H, NH) ppm; <sup>13</sup>C NMR (100 MHz, CDCl<sub>3</sub>): δ = 17.2, 55.6, 92, 111.3, 112.0, 113.2, 114.4, 120.9, 126.8, 128.6, 128.9, 131.1, 136.5, 141.1, 156.1 ppm; IR (KBr) (ν<sub>max</sub>/cm<sup>-1</sup>): 3640, 3508, 3349, 2224, 2200, 1686; Anal. Calcd for C<sub>18</sub>H<sub>14</sub>N<sub>4</sub>O<sub>3</sub>: C, 64.67; H, 4.22, N, 16.76; %. Found: C, 64.68; H, 4.25; N, 16.78; MS: m/z = 334 (M<sup>+</sup>).**(Table 2, Entry 4):**

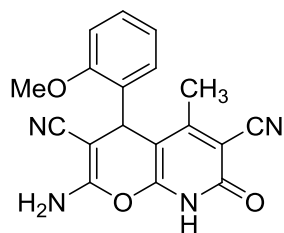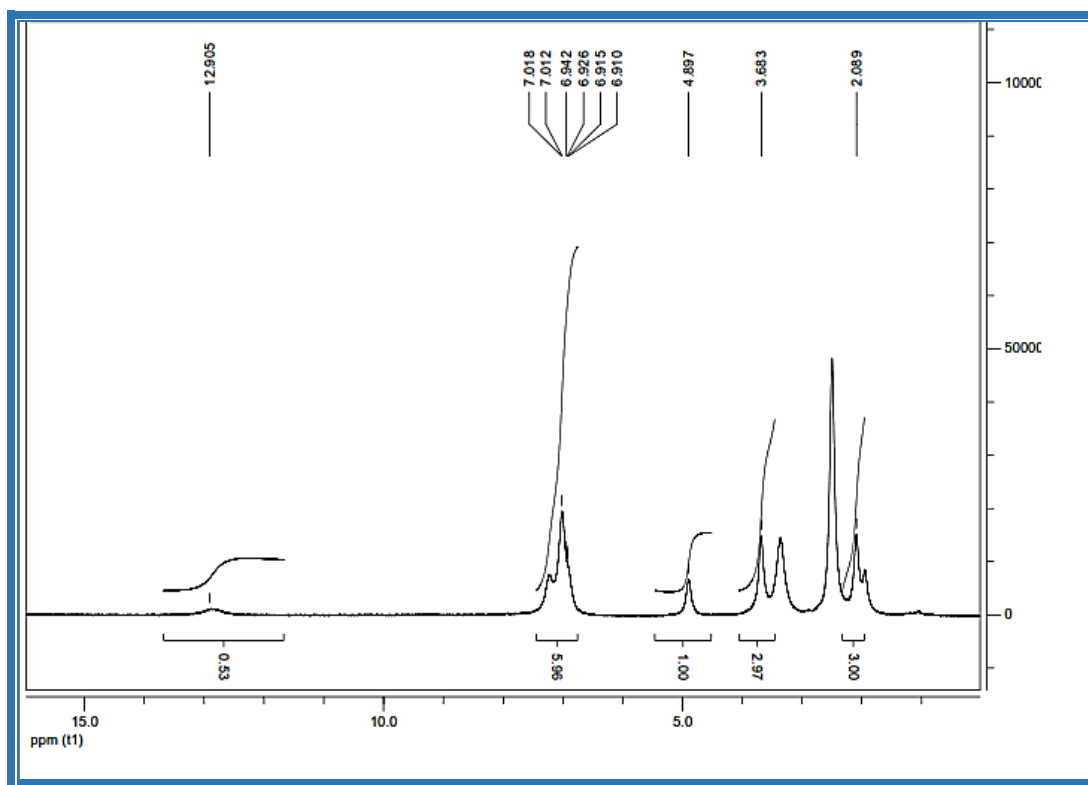

**Fig. D1** The <sup>1</sup>H NMR (500 MHz) spectrum of product (C<sub>4</sub>)

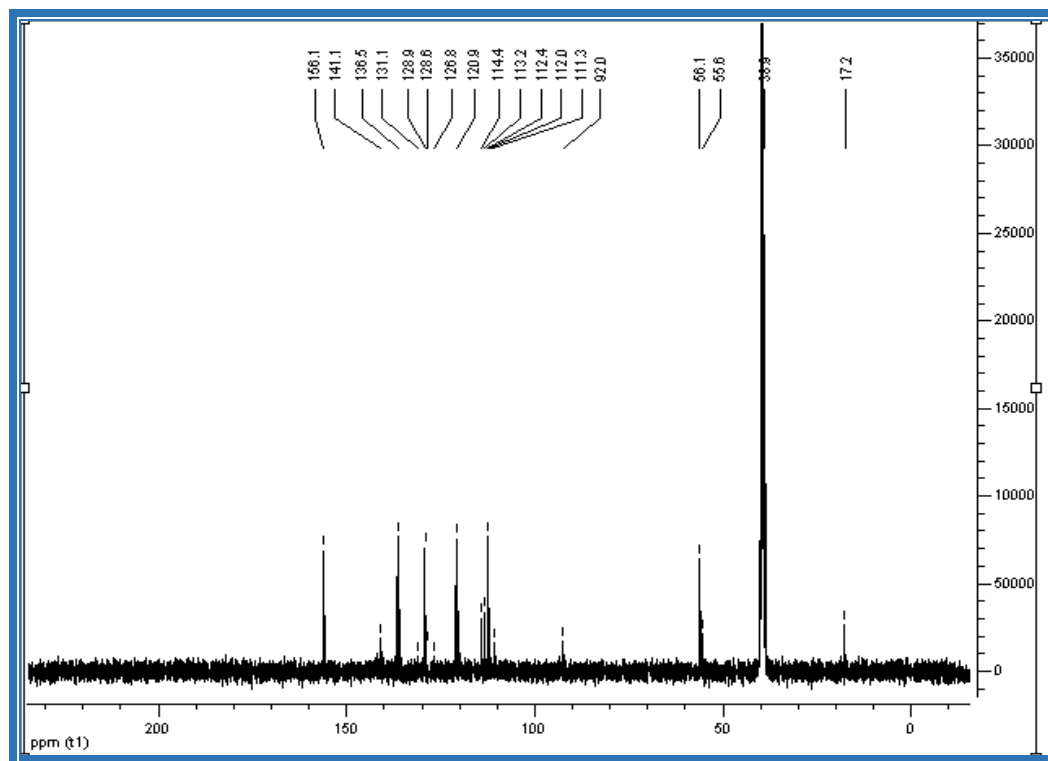

Fig. D2 The <sup>13</sup>C NMR (125 MHz) spectrum of product (C<sub>4</sub>)

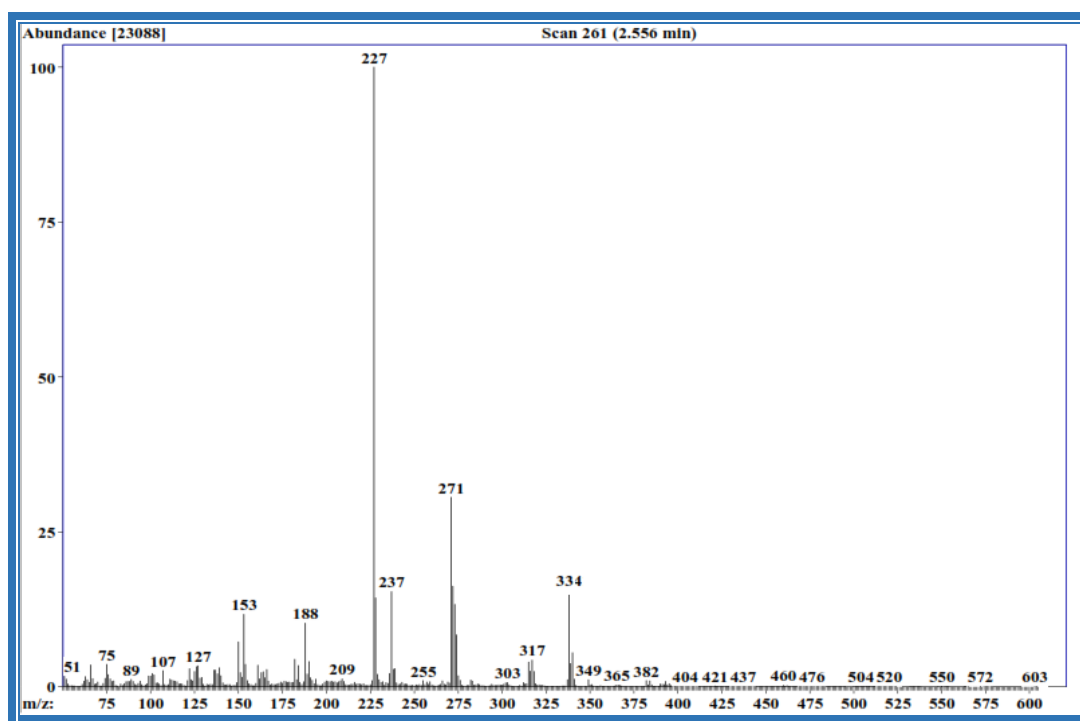

Fig. D3 The MS spectrum of product (C<sub>4</sub>)

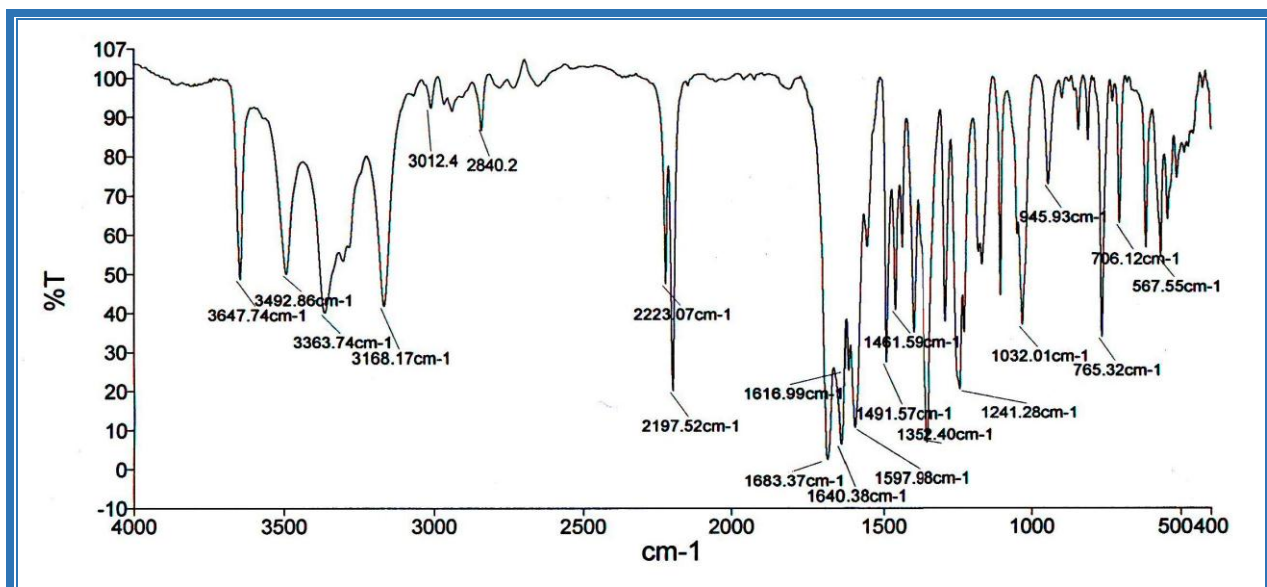

Fig. D4 The IR spectrum of product (C<sub>4</sub>)

**2-Amino-7,8-dihydro-5-methyl-7-oxo-4-(3-nitrophenyl)-4H-pyrano[2,3-b]pyridine-3,6-dicarbonitrile (C<sub>5</sub>)**

Yellow solid, mp 228-233 °C; <sup>1</sup>H NMR (FT-400 MHz, DMSO-d<sub>6</sub>/TMS): δ = 2.12 (s, 3H, CH<sub>3</sub>), 5.07 (s, 1H, C<sub>4</sub>-H), 7.31–8.14 (m, 6H, Ar-H and NH<sub>2</sub>), 13.01 (s, 1H, NH) ppm; <sup>13</sup>C NMR (100 MHz, CDCl<sub>3</sub>): δ = 18.2, 93.6, 107.3, 115.2, 119.7, 122.1, 122.6, 131.0, 134.3, 146.6, 148.4, 156.0, 156.8, 159.6, 164.0 ppm; IR (KBr) (ν<sub>max</sub>/cm<sup>-1</sup>): 3648, 3484, 3356, 2225, 2197, 1681; Anal. Calcd for C<sub>17</sub>H<sub>11</sub>N<sub>5</sub>O<sub>4</sub>: C, 58.46; H, 3.17; N, 20.05 %. Found: C, 58.48; H, 3.18; N, 20.06; MS: m/z = 349 (M<sup>+</sup>). (Table 2, Entry 5):

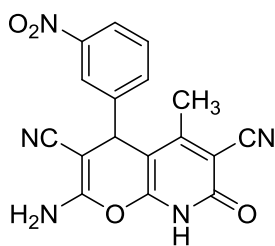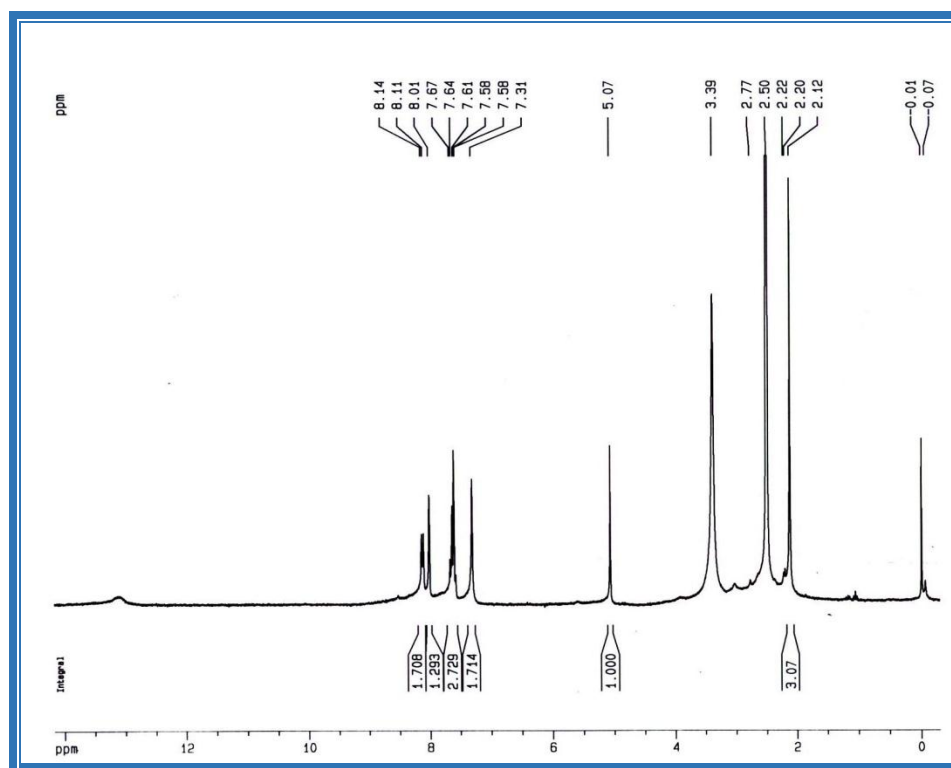

**Fig. E1** The <sup>1</sup>H NMR (400 MHz) spectrum of product (C<sub>5</sub>)

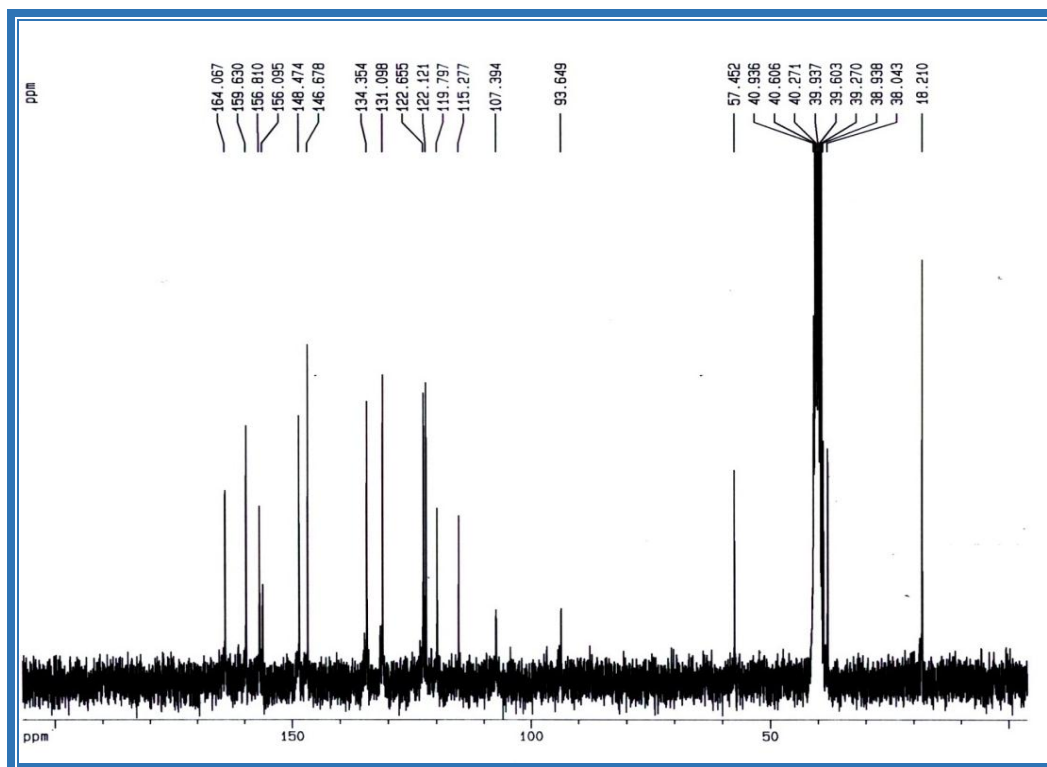

Fig. E2 The  $^{13}\text{C}$  NMR (100 MHz) spectrum of product ( $\text{C}_5$ )

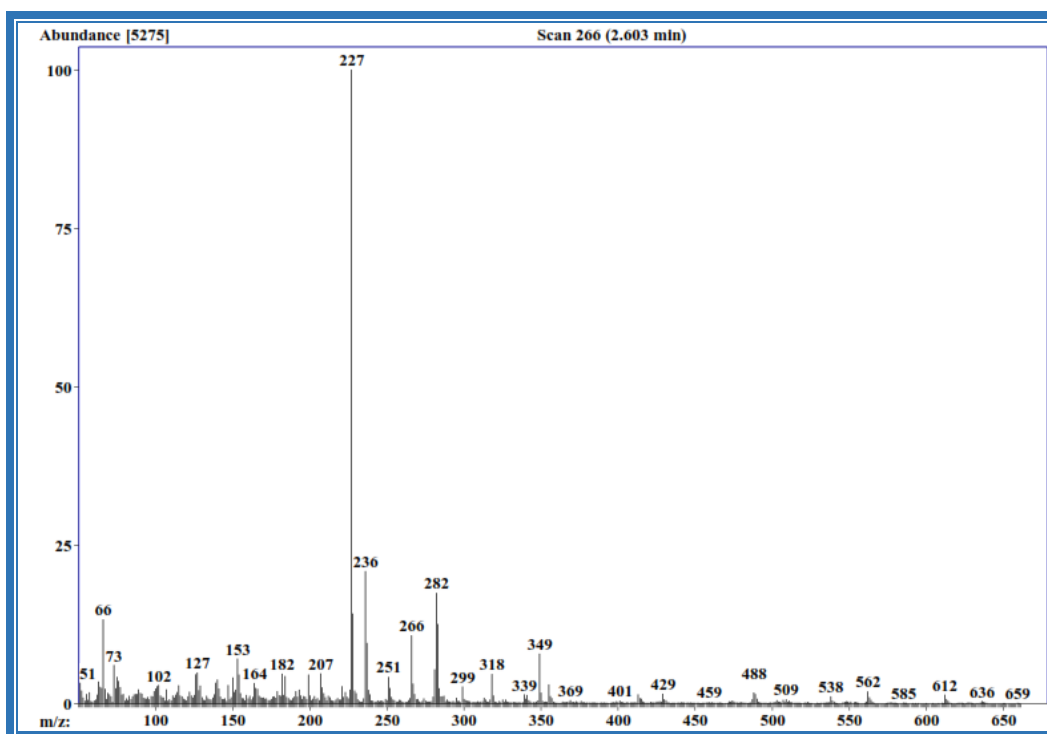

Fig. E3 The MS spectrum of product ( $\text{C}_5$ )

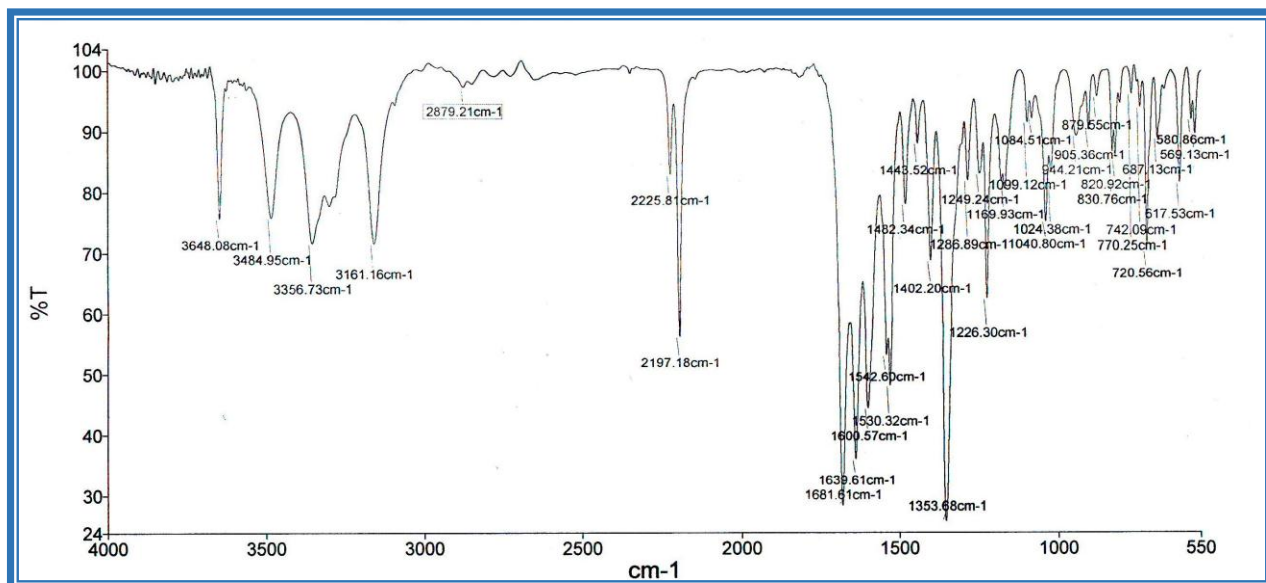

**Fig. E4** The IR spectrum of product (C<sub>5</sub>)



**2-Amino-7,8-dihydro-5-methyl-7-oxo-4-(4-nitrophenyl)-4H- pyrano[2,3-b]pyridine-3,6-dicarbonitrile (C<sub>6</sub>)**

Yellow solid, mp 246-248 °C; <sup>1</sup>H NMR (FT-400 MHz, DMSO-d<sub>6</sub>/TMS): δ = 2.28 (s, 3H, CH<sub>3</sub>), 5.19 (s, 1H, C<sub>4</sub>-H), 7.57–8.37 (m, 6H, Ar-H and NH<sub>2</sub>), 13.28 (s, 3H, CH<sub>3</sub>)ppm; <sup>13</sup>C NMR (100 MHz, CDCl<sub>3</sub>): δ = 17.6, 56.5, 114.7, 119.2, 124.2, 128.4, 146.4, 151.3, 156.2, 159.1, 163.6, ppm; IR (KBr) (ν<sub>max</sub>/cm<sup>-1</sup>): 3648, 3484, 3355, 2225, 2197, 1682; Anal. Calcd for C<sub>17</sub>H<sub>11</sub>N<sub>5</sub>O<sub>4</sub>: C, 58.46; H, 3.17; N, 20.05 %. Found: C, 58.49; H, 3.18; N, 20.09; MS m/z = 349 (M<sup>+</sup>). (Table 2, Entry 5):

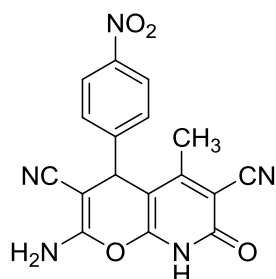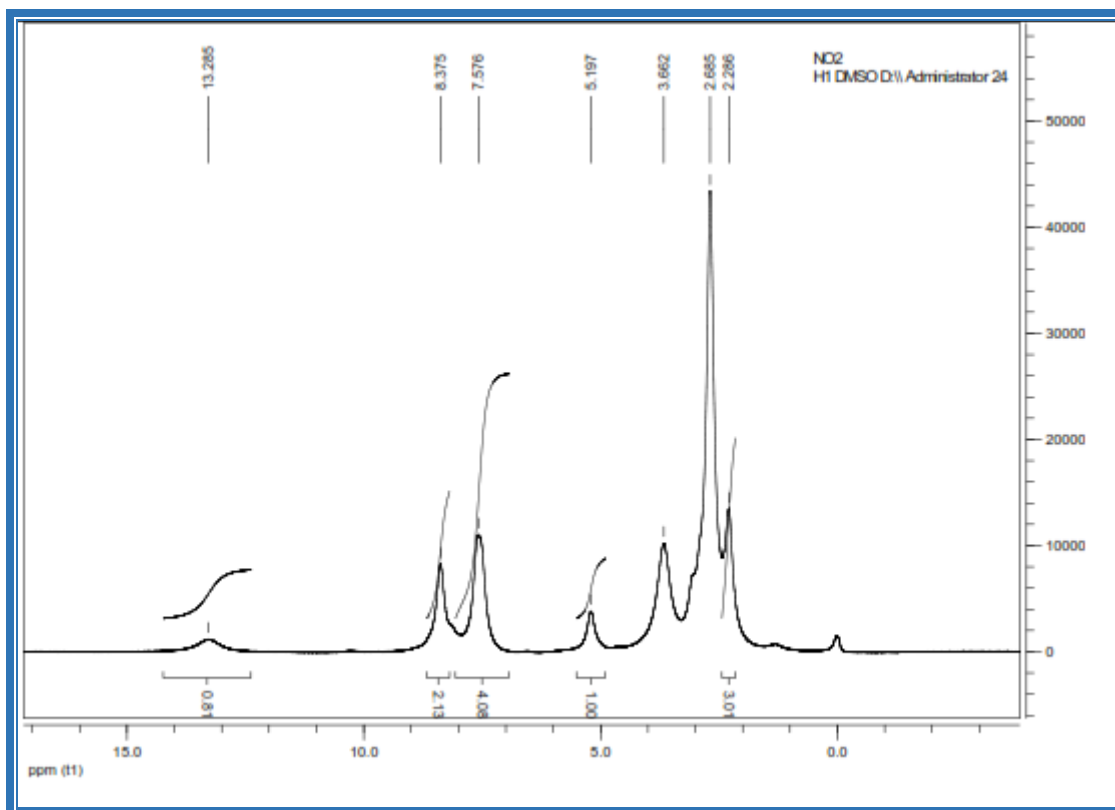

**Fig. F1** The <sup>1</sup>H NMR (300 MHz) spectrum of product (C<sub>6</sub>)

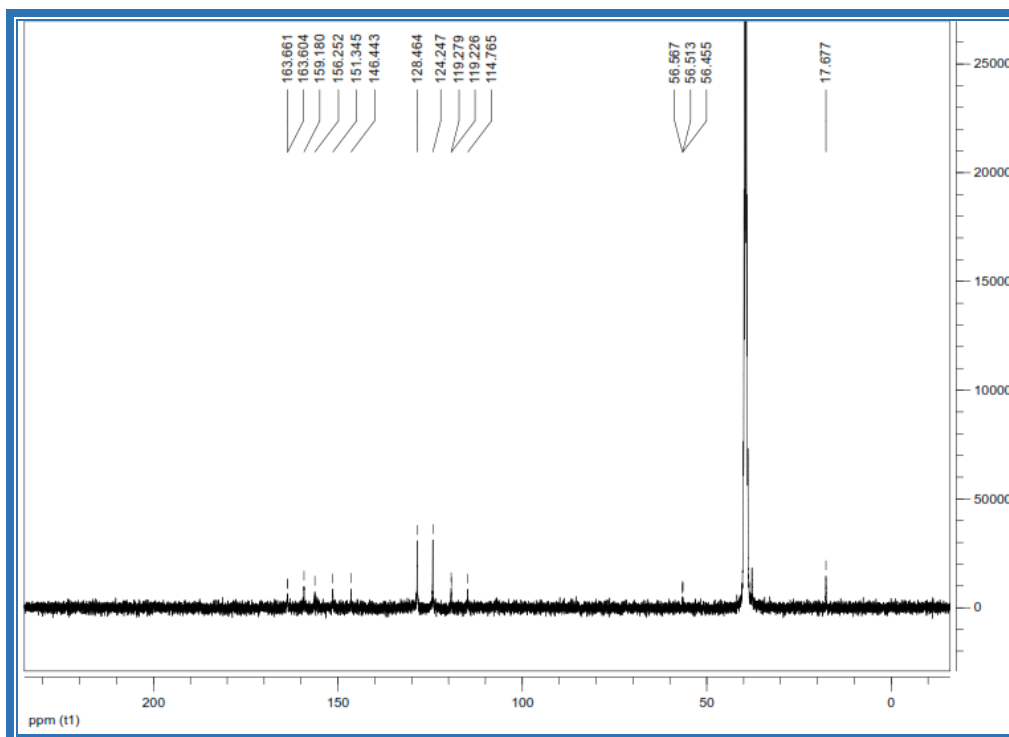

**Fig. F2** The  $^{13}\text{C}$  NMR (75 MHz) spectrum of product ( $\text{C}_6$ )

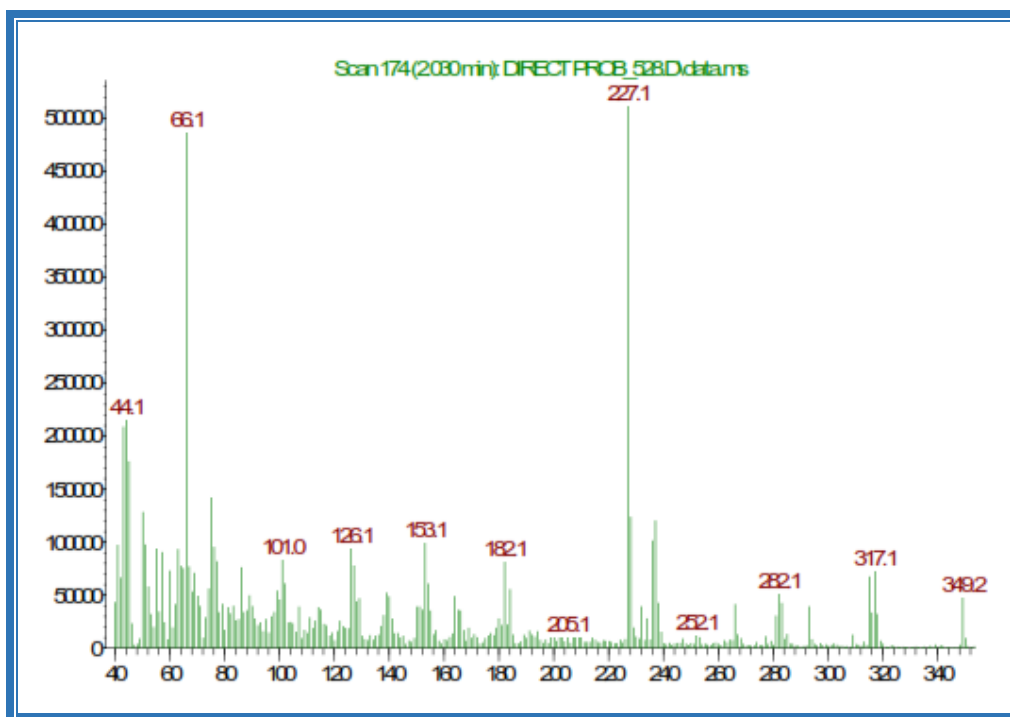

**Fig. F3** The MS spectrum of product ( $\text{C}_6$ )

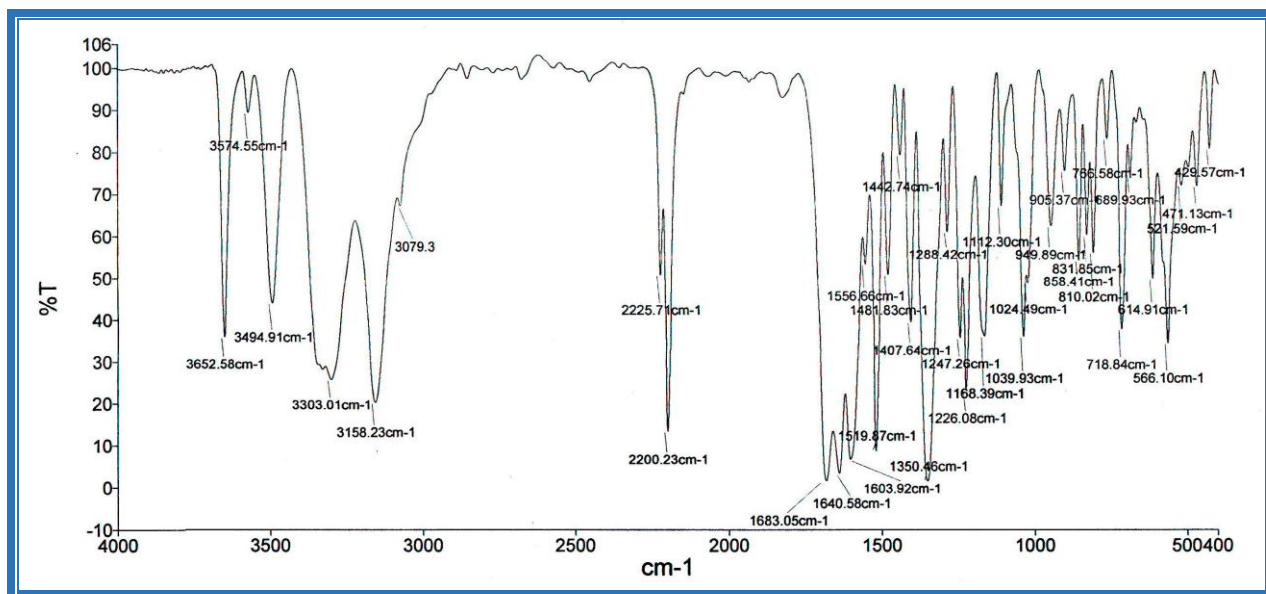

**Fig. F4** The IR spectrum of product (C<sub>6</sub>)

**2-Amino-7,8-dihydro-5-methyl-7-oxo-4-(2-nitrophenyl)-4H-pyrano[2,3-b]pyridine-3,6-dicarbonitrile (C<sub>7</sub>)**

Yellow solid, mp 205-208 °C; <sup>1</sup>H NMR (FT-400 MHz, DMSO-d<sub>6</sub>/TMS): δ = 2.07 (s, 3H, CH<sub>3</sub>), 5.51 (s, 1H, C<sub>4</sub>-H), 7.29–7.95 (m, 6H, Ar-H and NH<sub>2</sub>) 13.12 (s, 3H, CH<sub>3</sub>)ppm; <sup>13</sup>C NMR (100 MHz, CDCl<sub>3</sub>): δ = 17.74, 33.8, 55.9, 114.7, 118.8, 124.6, 128.7, 130.6, 134.2, 137.3, 147.8, 156, 159.1, 162.2, 163.6 ppm; IR (KBr) (ν<sub>max</sub>/cm<sup>-1</sup>): 3648, 3484, 3355, 2225, 2197, 1682; Anal. Calcd for C<sub>17</sub>H<sub>11</sub>N<sub>5</sub>O<sub>4</sub>: C, 58.46; H, 3.17; N, 20.05 %. Found: C, 58.50; H, 3.19; N, 20.06; MS: m/z = 349 (M<sup>+</sup>). (Table 2, Entry 7):

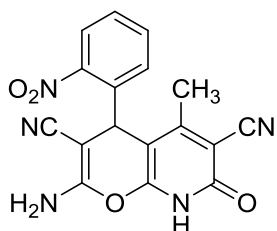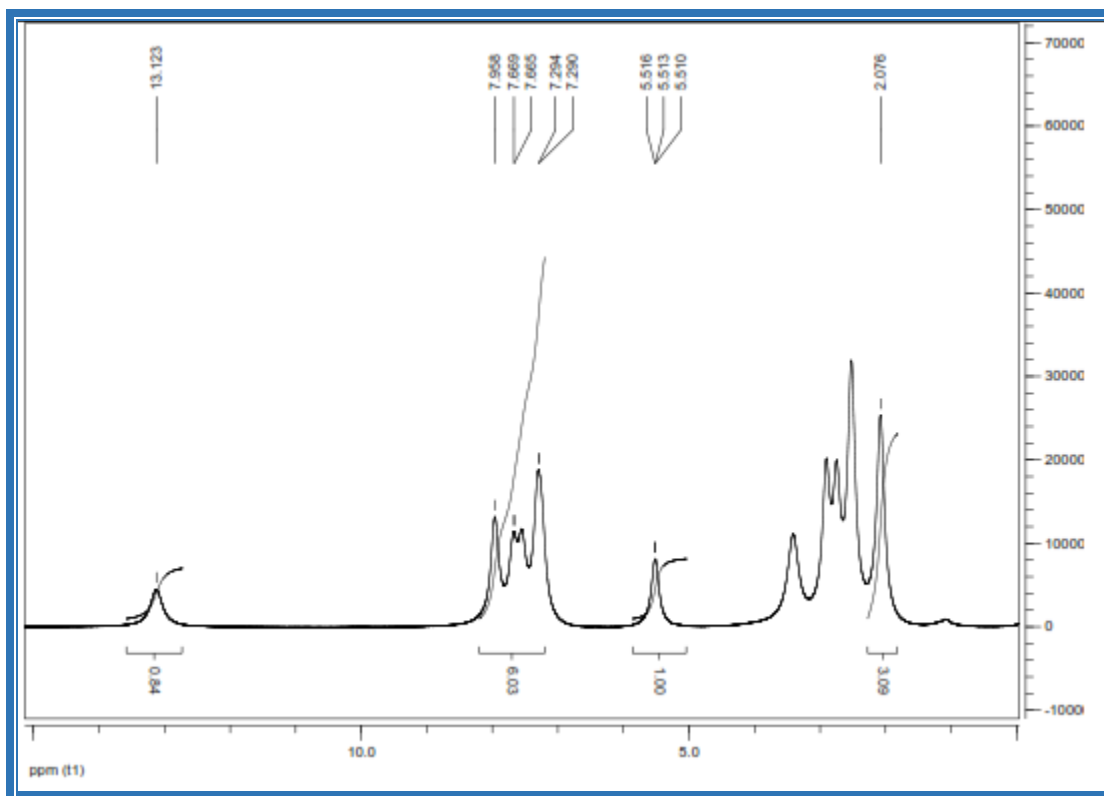

**Fig. G1** The <sup>1</sup>H NMR (500 MHz) spectrum of product (C<sub>7</sub>)

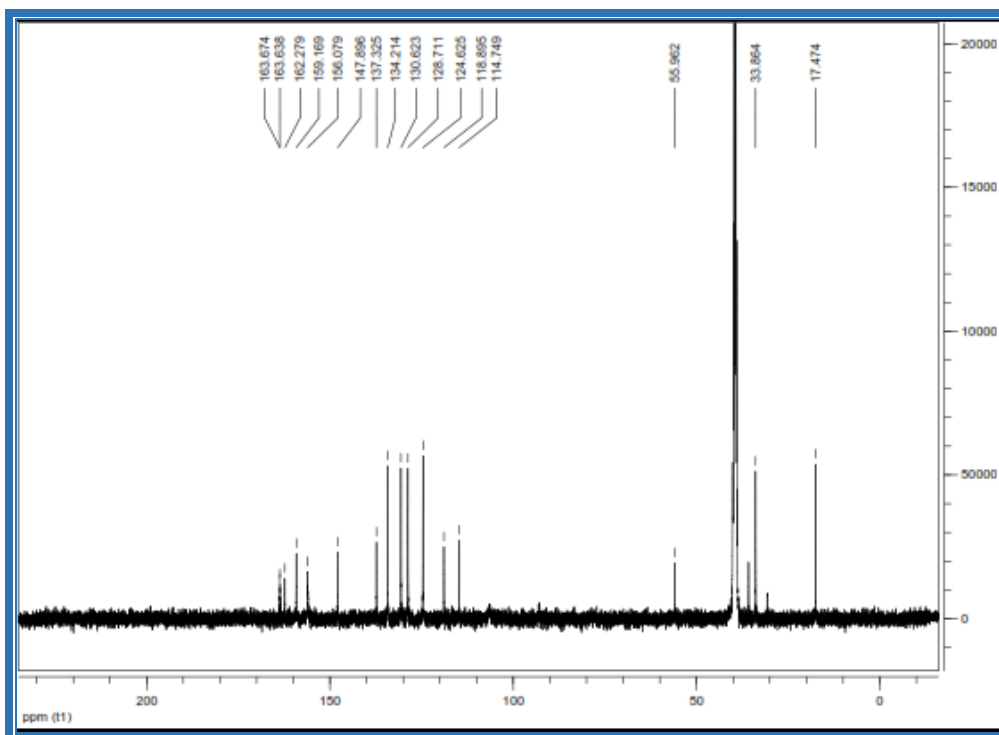

**Fig. G2** The  $^{13}\text{C}$  NMR (125 MHz) spectrum of product ( $\text{C}_7$ )

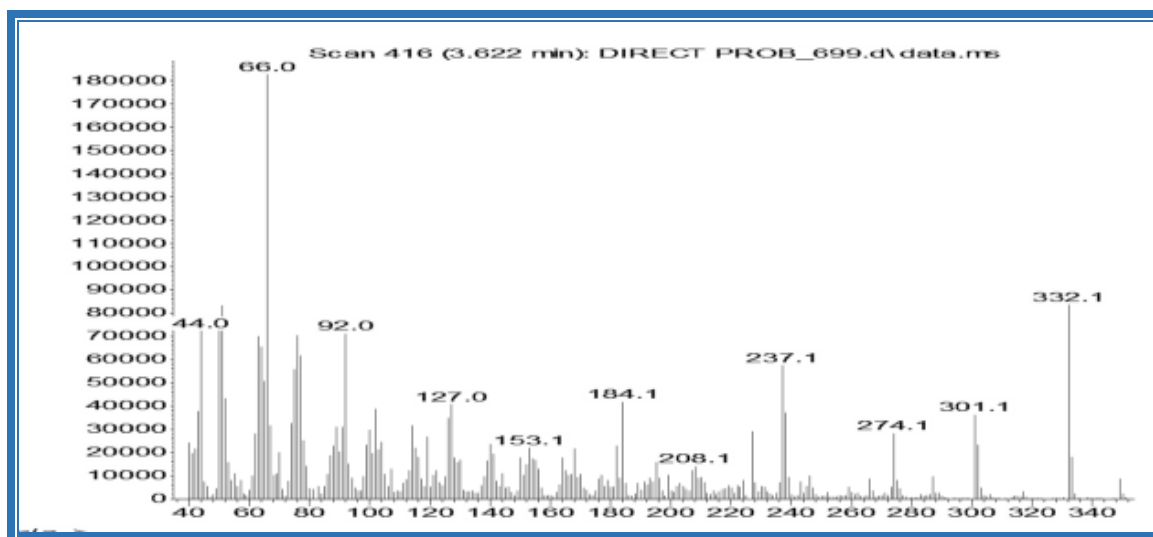

**Fig. G3** The MS spectrum of product ( $\text{C}_7$ )

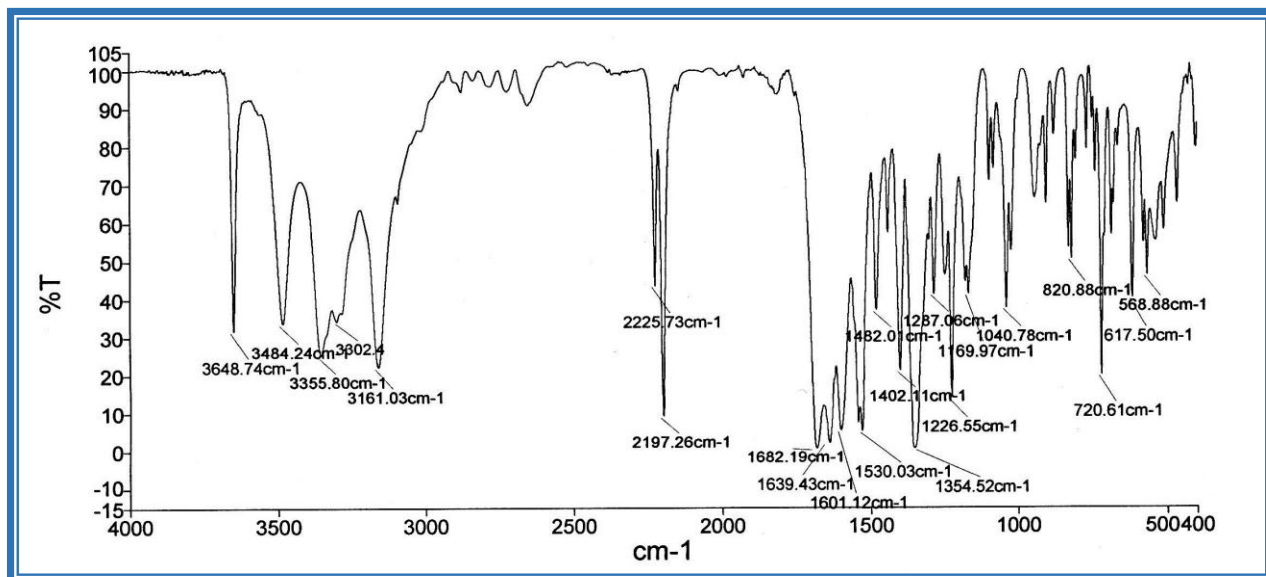

Fig. G4 The IR spectrum of product (C<sub>7</sub>)

**2-Amino-7,8-dihydro-5-methyl-7-oxo-4-(4-bromophenyl)-4H-pyrano[2,3-b]pyridine-3,6-dicarbonitrile(C<sub>8</sub>)**

White solid, mp 238-241°C; <sup>1</sup>H NMR (400 MHz, DMSO-d<sub>6</sub>): δ = 2.21 (s, 3H, CH<sub>3</sub>), 4.89 (s, 1H, C<sub>4</sub>-H), 7.19–7.91 (m, 6H, Ar-H, and NH<sub>2</sub>) 13.09 (s, 1H, NH)ppm; <sup>13</sup>C NMR (100 MHz, CDCl<sub>3</sub>): δ = 17.6, 57.4, 114.8, 119.4, 120.1, 129.3, 131.7, 143.5, 155.5, 156.1, 158.9, 163.4 ppm; IR (KBr) (ν<sub>max</sub>/cm<sup>-1</sup>): 3649, 3504, 3349, 2220, 2199, 1683; Anal. Calcd for C<sub>17</sub>H<sub>11</sub>BrN<sub>4</sub>O<sub>2</sub>: C, 53.28; H, 2.89, N, 14.62; %. Found: C, 53.30; H, 2.93; N, 14.65; MS: m/z = 383 (M<sup>+</sup>).**(Table 2, Entry 8):**

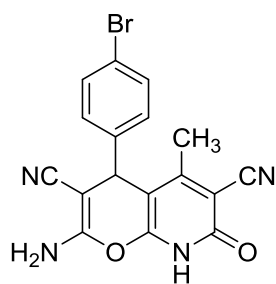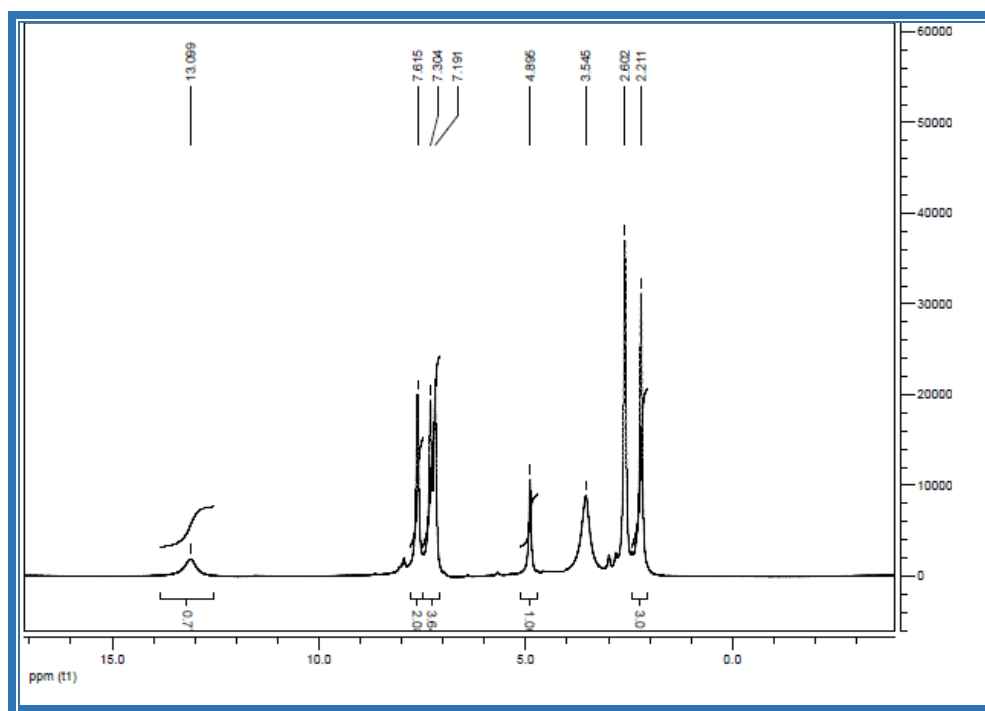

**Fig. H1** The <sup>1</sup>H NMR (500 MHz) spectrum of product (C<sub>8</sub>)

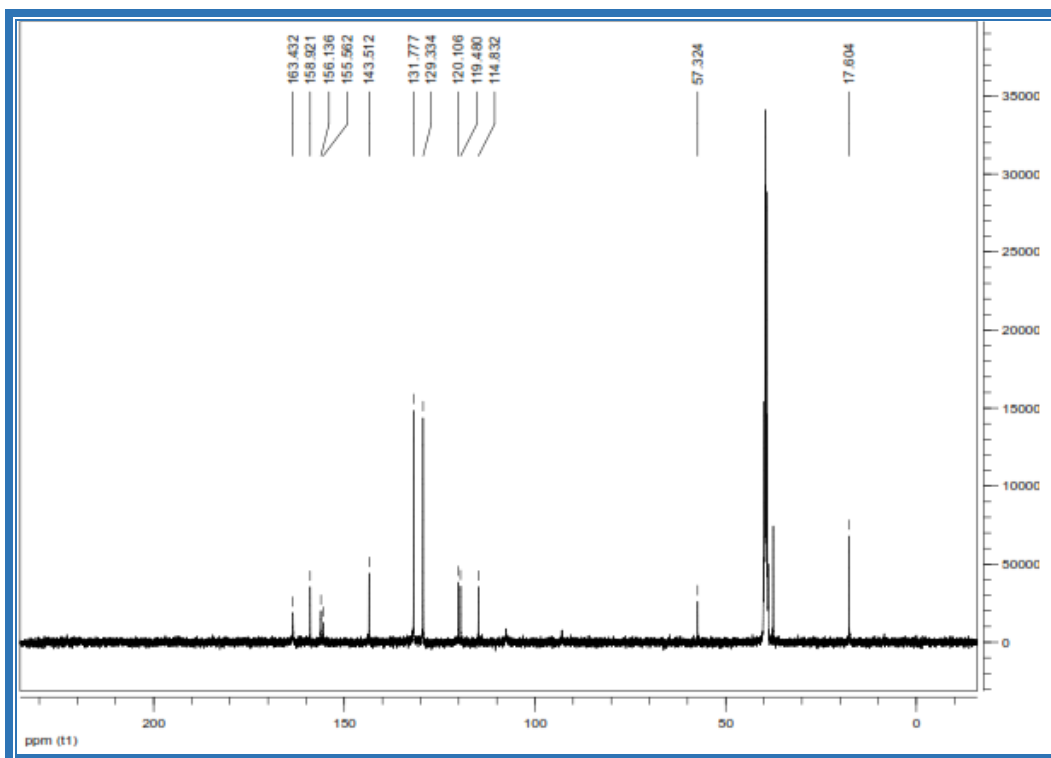

**Fig. H2** The <sup>13</sup>C NMR (125 MHz) spectrum of product (**C<sub>8</sub>**)

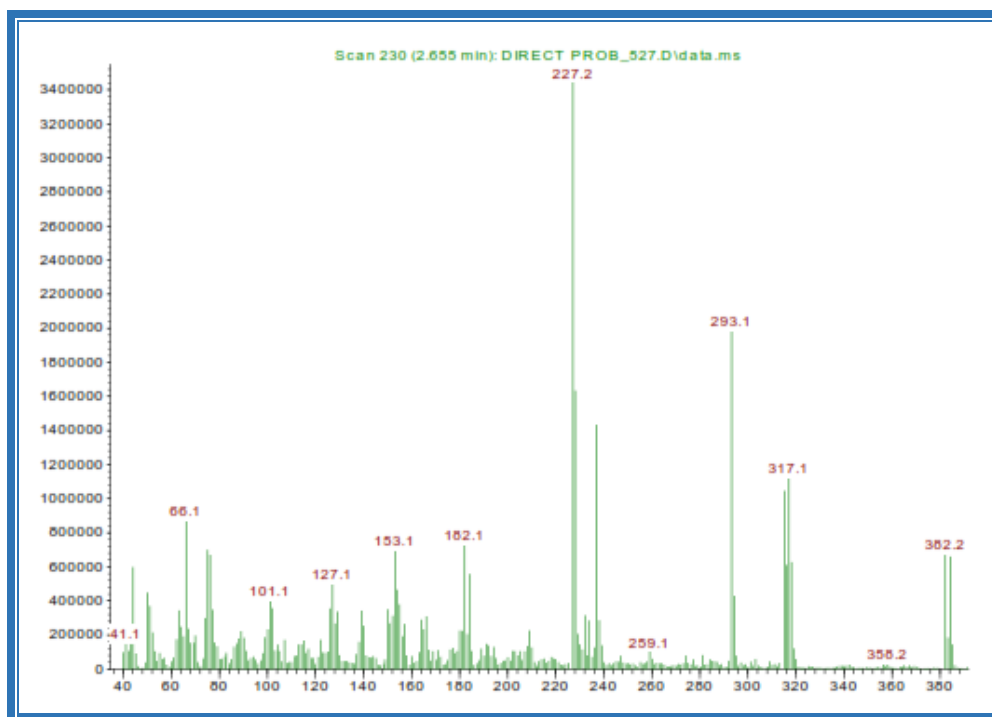

**Fig. H3** The MS spectrum of product (**C<sub>8</sub>**)



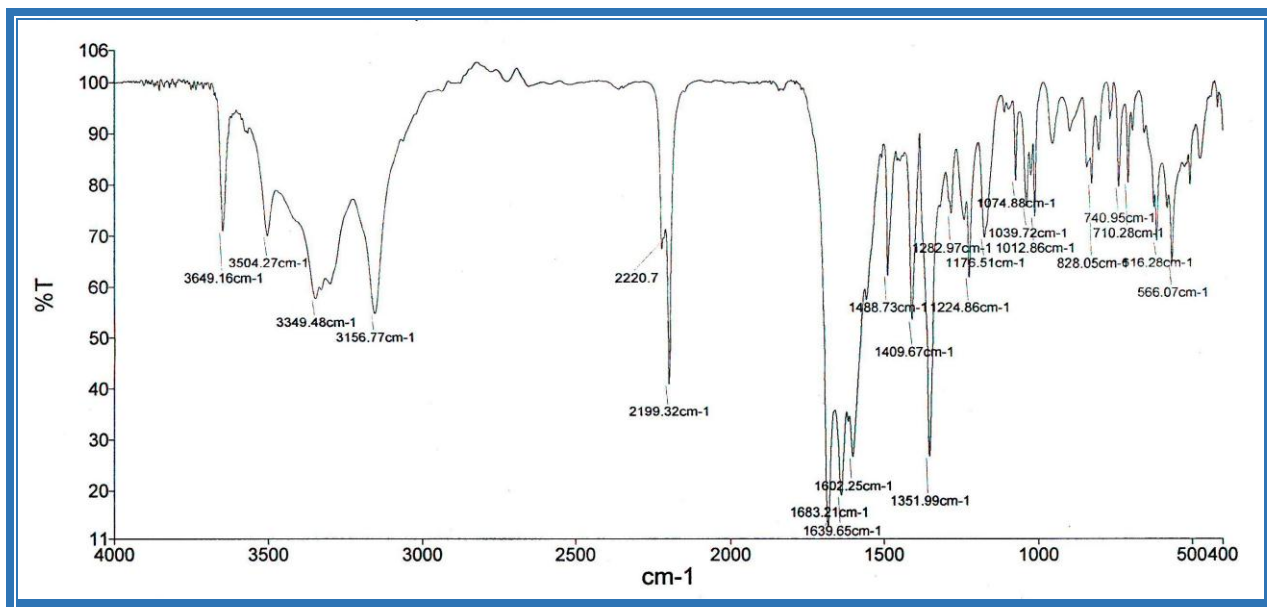

**Fig. H4** The IR spectrum of product (C<sub>8</sub>)

**2-Amino-7,8-dihydro-5-methyl-7-oxo-4-(2,4-dichlorophenyl)-4H-pyrano[2,3-b]pyridine-3,6-dicarbonitrile (C<sub>9</sub>)**

White solid, mp 229-232 °C; <sup>1</sup>H NMR (400 MHz, DMSO-d<sub>6</sub>): δ = 2.06 (s, 3H, CH<sub>3</sub>), 5.17 (s, 1H, C<sub>4</sub>-H), 7.25–7.62 (m, 5H, Ar-H, NH<sub>2</sub>), 13.04 (s, 1H, NH) ppm; <sup>13</sup>C NMR (100 MHz, CDCl<sub>3</sub>): δ = 17.5, 35.6, 55.3, 114.7, 118.9, 128.3, 129.2, 132.1, 139.6, 155.9, 159.2, 169, 174.9, 188.4 ppm; IR (KBr) (ν<sub>max</sub>/cm<sup>-1</sup>): 3650, 3499, 3348, 2225, 2200, 1683; Anal. Calcd for C<sub>17</sub>H<sub>10</sub>Cl<sub>2</sub>N<sub>4</sub>O<sub>2</sub>: C, 54.71; H, 2.70, N, 15.01; %. Found: C, 57.75; H, 2.73; N, 15.04; MS: m/z = 372 (M<sup>+</sup>). **(Table 2, Entry 9):**

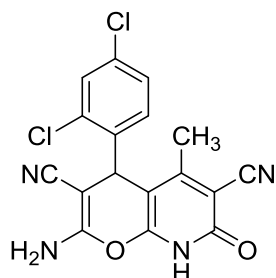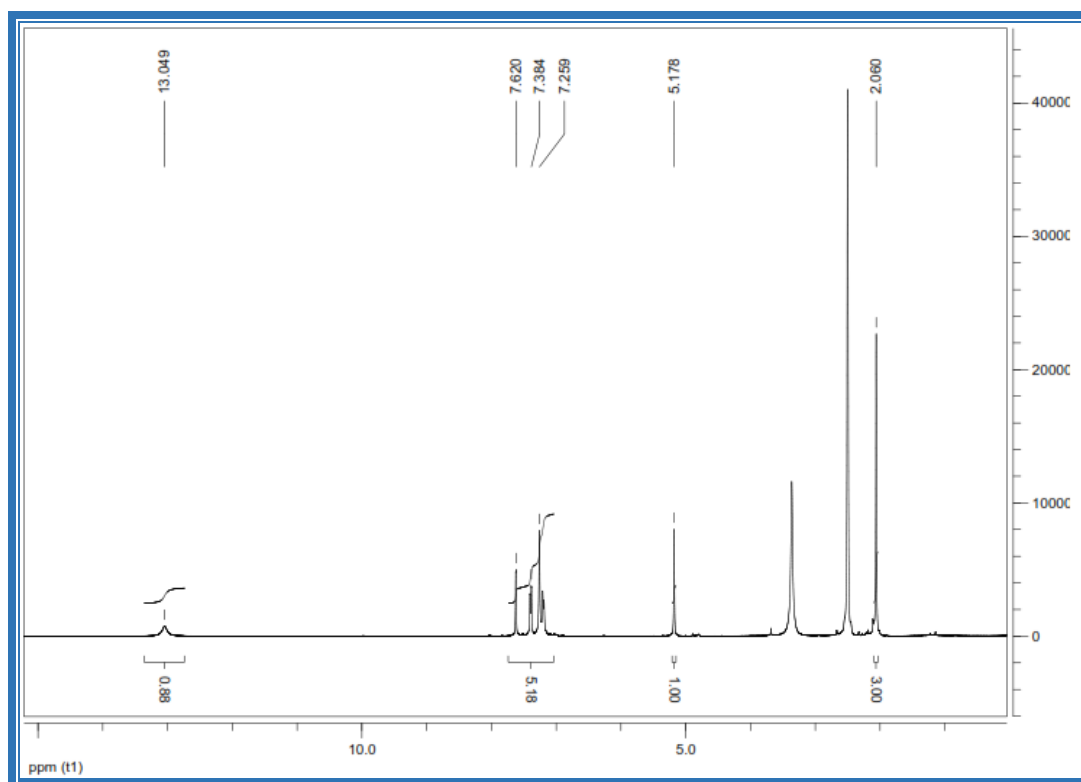

**Fig. I1** The <sup>1</sup>H NMR (500 MHz) spectrum of product (C<sub>9</sub>)

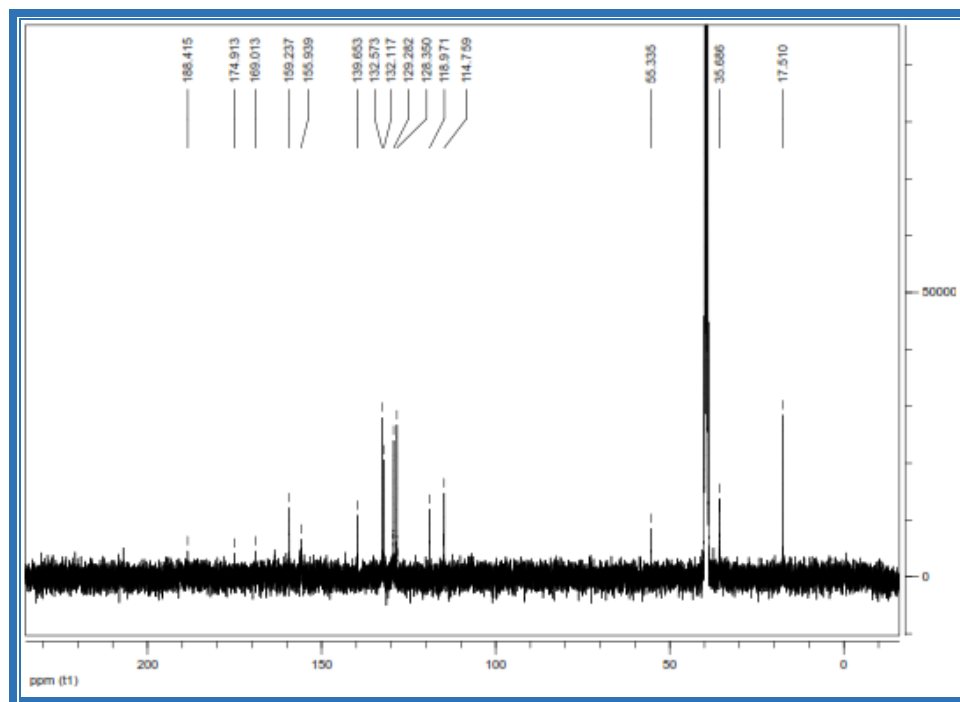

**Fig. I2** The  $^{13}\text{C}$  NMR (125 MHz) spectrum of product (**C<sub>9</sub>**)

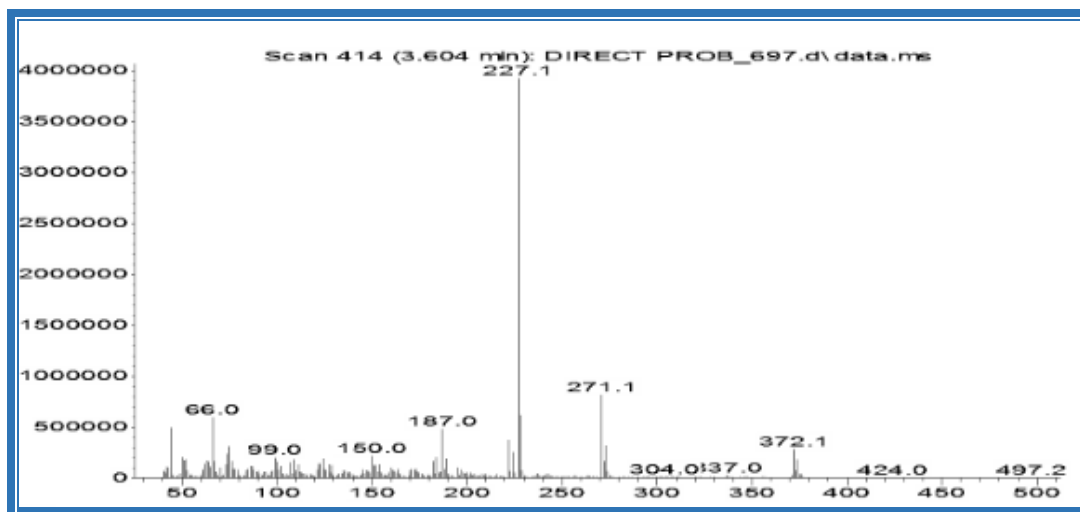

**Fig. I3** The MS spectrum of product (**C<sub>9</sub>**)

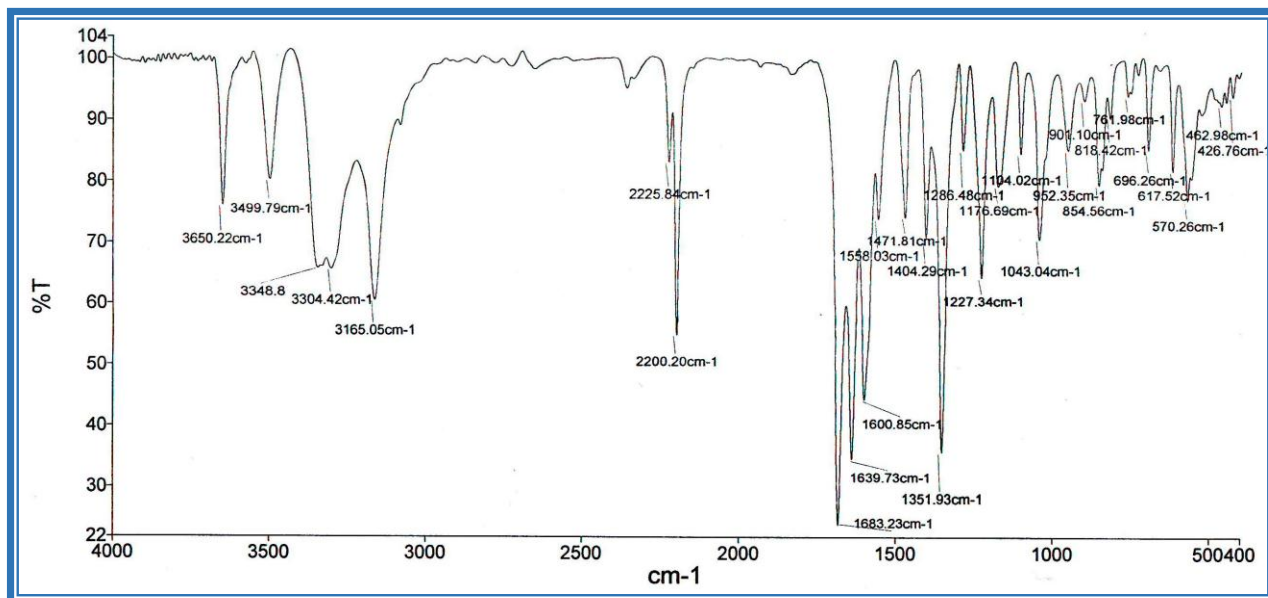

**Fig. I4** The IR spectrum of product (C<sub>9</sub>)

**2-Amino-7,8-dihydro-5-methyl-7-oxo-4-(phenyl)-4H-pyrano[2,3-b]pyridine-3,6-dicarbonitrile (C<sub>10</sub>)**

White solid, mp 221-223 °C; <sup>1</sup>H NMR (400 MHz, DMSO-d<sub>6</sub>): δ = 2.21 (s, 3H, CH<sub>3</sub>), 4.74 (s, 1H, C<sub>4</sub>-H), 7.61–8.56 (m, 8H, Ar-H, NH and NH<sub>2</sub>) ppm; <sup>13</sup>CNMR (100 MHz, CDCl<sub>3</sub>): δ = 17.5, 38.8, 54.2, 81.5, 113.1, 114.1, 129.5, 130.4, 131.2, 134.3, 161.5 ppm; IR (KBr) (ν<sub>max</sub>/cm<sup>-1</sup>): 3639, 3498, 3349, 3152, 2222, 2198, 1685; Anal. Calcd for C<sub>17</sub>H<sub>12</sub>N<sub>4</sub>O<sub>2</sub>: C, 67.10; H, 3.97; N, 18.41 %. Found: C, 67.13; H, 4.01; N, 18.43; MS m/z = 304 (M<sup>+</sup>). (**Table 2, Entry 10**):

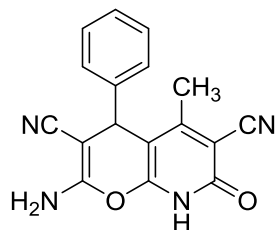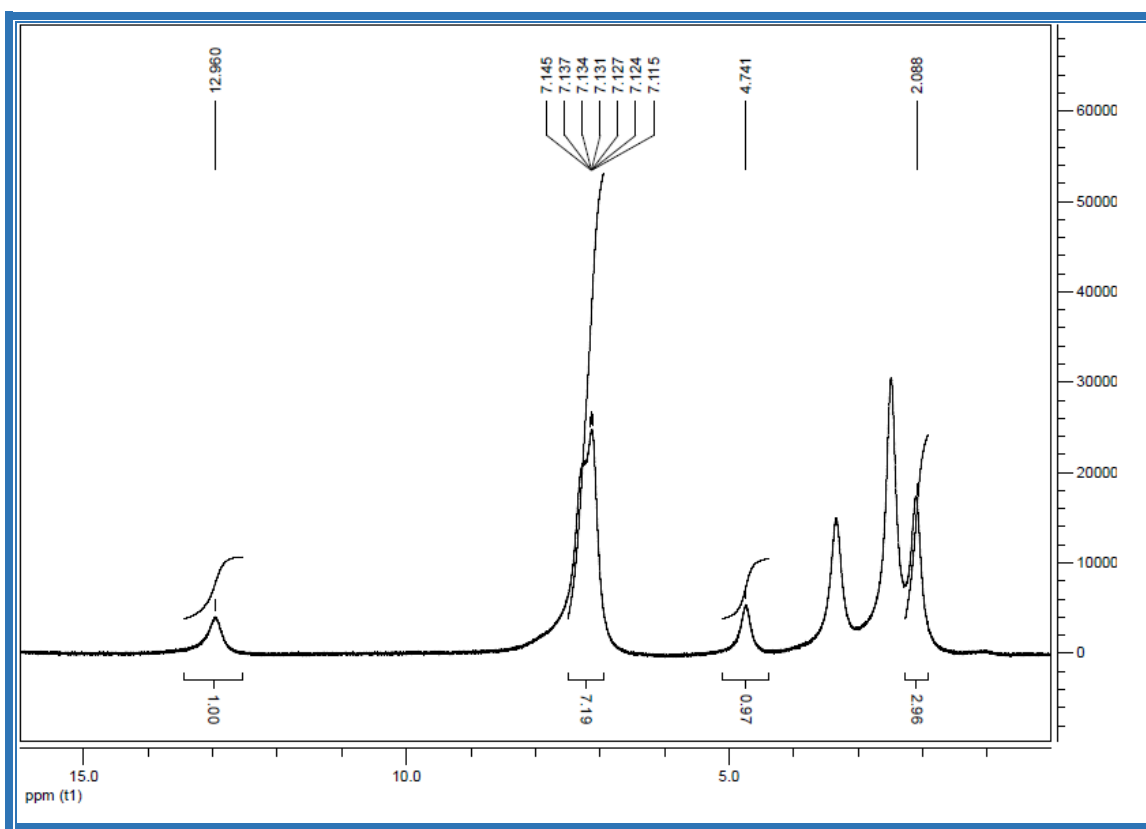

**Fig. J1** The <sup>1</sup>H NMR (400 MHz) spectrum of product (C<sub>10</sub>)

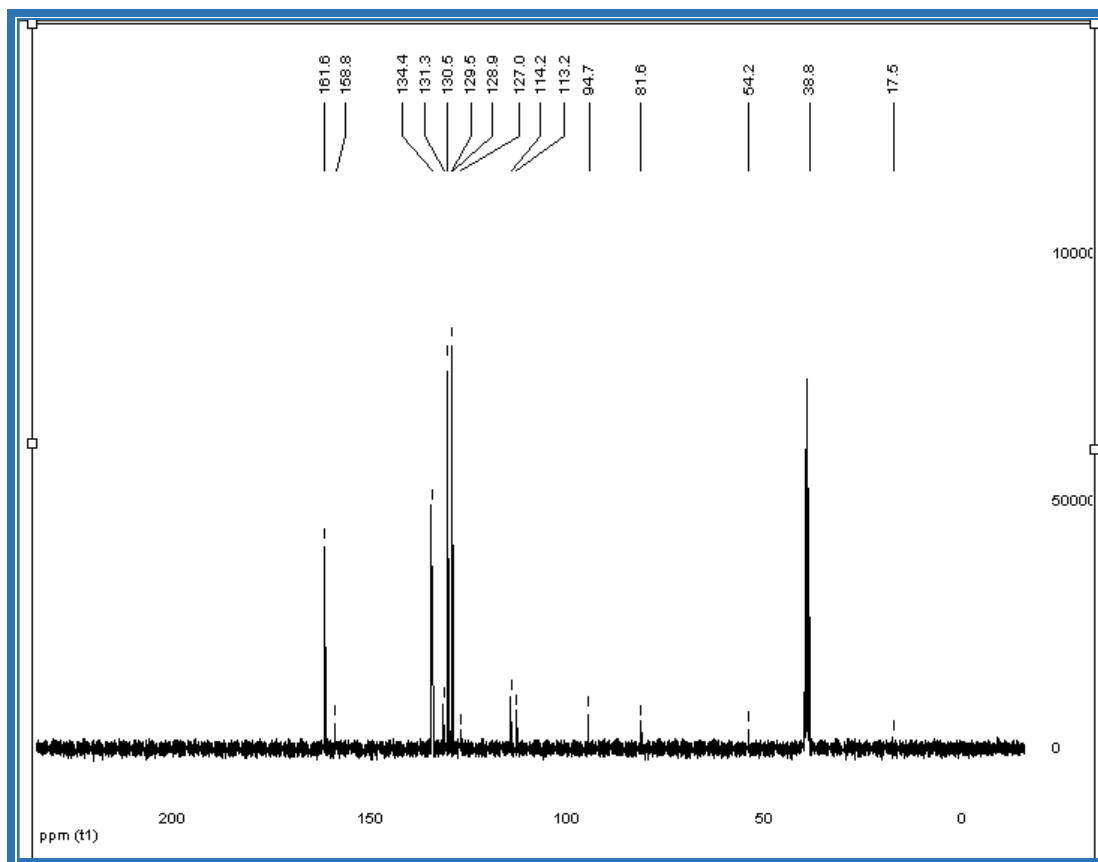

**Fig. J2** The  $^{13}\text{C}$  NMR (100 MHz) spectrum of product (C<sub>10</sub>)

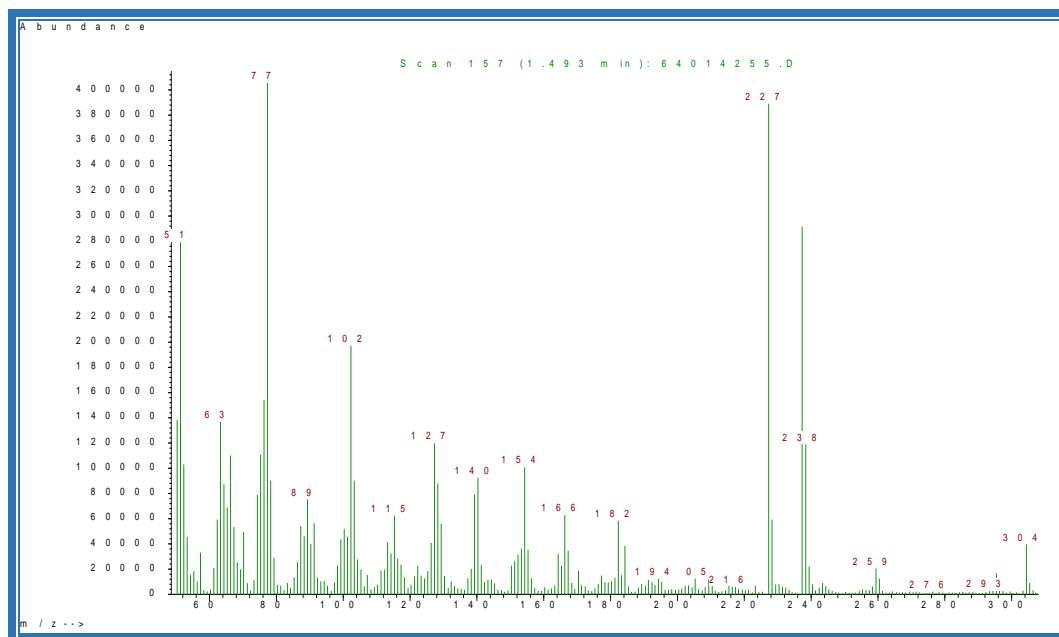

**Fig. J3** The MS spectrum of product (C<sub>10</sub>)

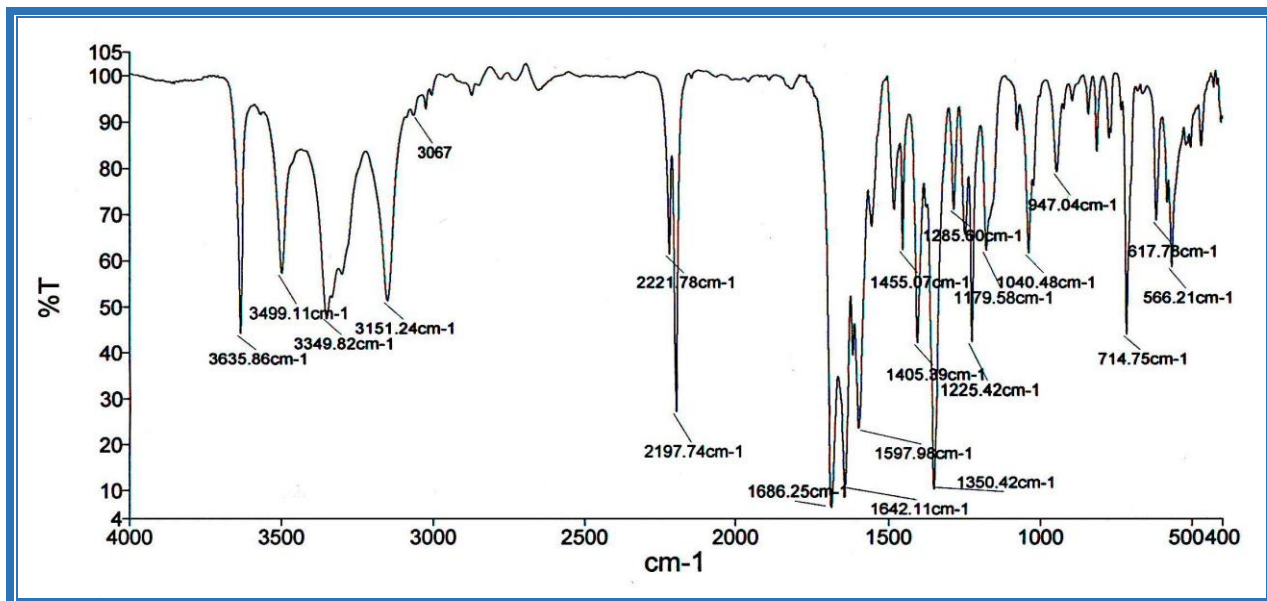

Fig. J4 The IR spectrum of product (C<sub>10</sub>)

**2-Amino-7,8-dihydro-5-methyl-7-oxo-4-(2-chlorophenyl)-4H-pyrano[2,3-b]pyridine-3,6-dicarbonitrile (C<sub>11</sub>)**

White solid, mp 253–258°C; <sup>1</sup>H NMR (400 MHz, DMSO-d<sub>6</sub>): δ = 2.08 (s, 3H, CH<sub>3</sub>), 5.19 (s, 1H, C<sub>4</sub>-H), 7.26–7.28 (m, 6H, Ar-H, and NH<sub>2</sub>) 13.04 (s, 1H, NH) ppm; <sup>13</sup>C NMR (100 MHz, CDCl<sub>3</sub>): δ = 17.4, 55.7, 114.7, 119.1, 128.1, 129.8, 130.7, 140.5, 151.3, 159.2 163.5, 170.8 ppm; IR (KBr) (ν<sub>max</sub>/cm<sup>-1</sup>): 3648, 3496, 3356, 2225, 2199, 1683; Anal. Calcd for C<sub>17</sub>H<sub>11</sub>ClN<sub>4</sub>O<sub>2</sub>: C, 60.28; H, 3.27, N, 16.54; %. Found: C, 60.31; H, 3.30; N, 16.57; MS: m/z = 338 (M<sup>+</sup>). (**Table 2, Entry 11**):

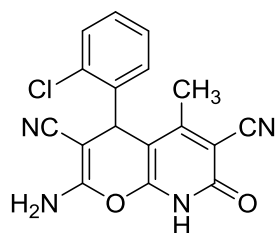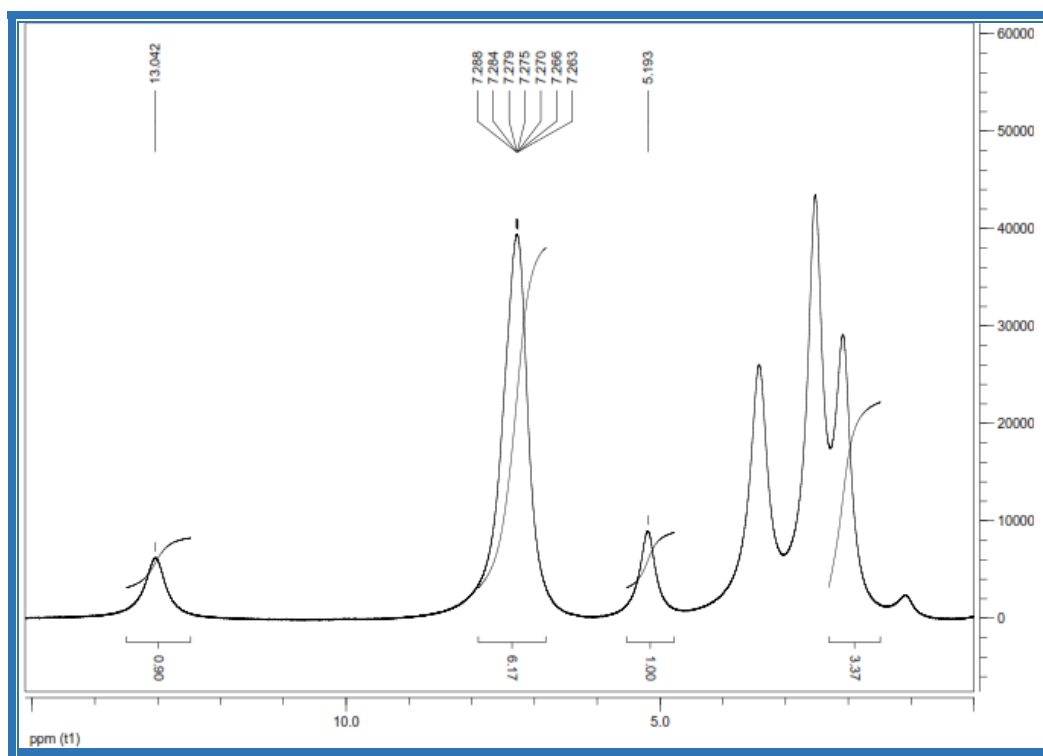

**Fig. K1** The <sup>1</sup>H NMR (400 MHz) spectrum of product (C<sub>11</sub>)



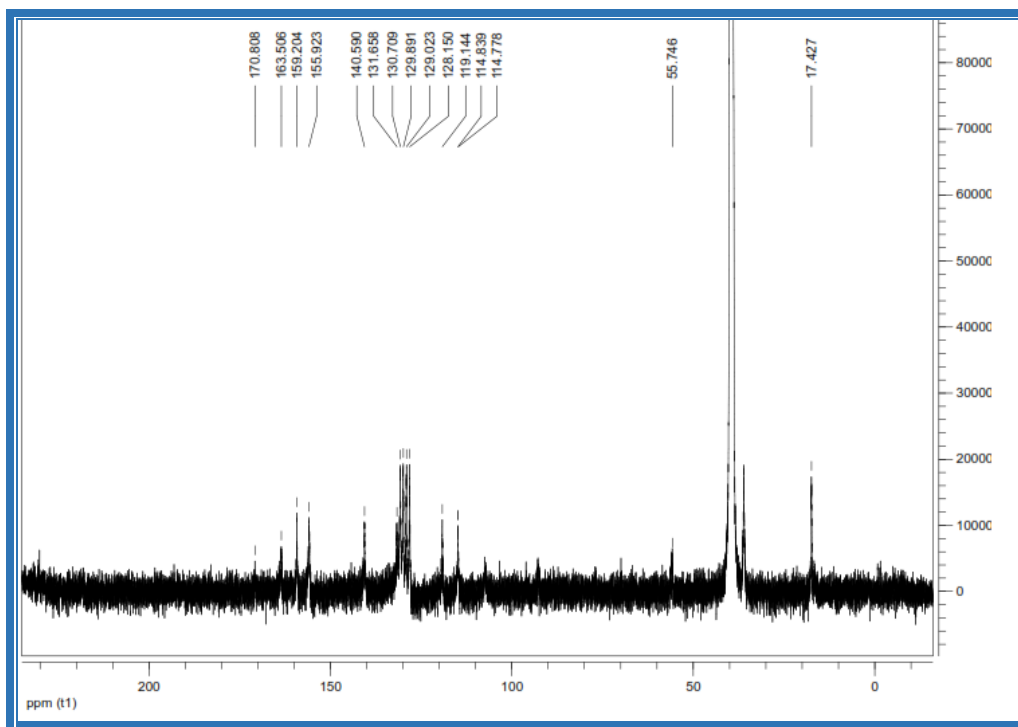

**Fig. K2** The  $^{13}\text{C}$  NMR (100 MHz) spectrum of product (**C<sub>11</sub>**)

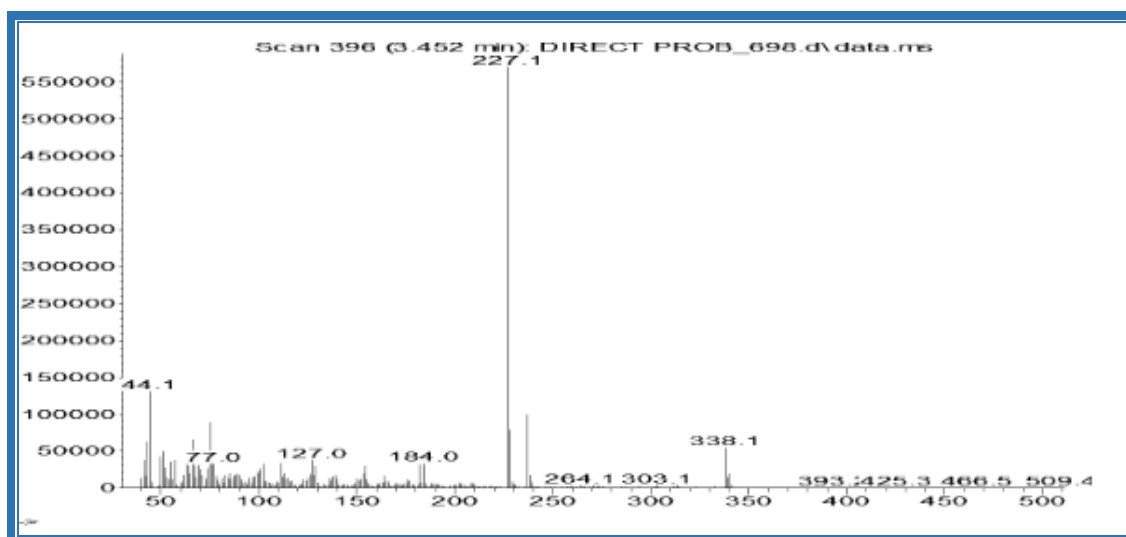

**Fig. K3** The MS spectrum of product (**C<sub>11</sub>**)

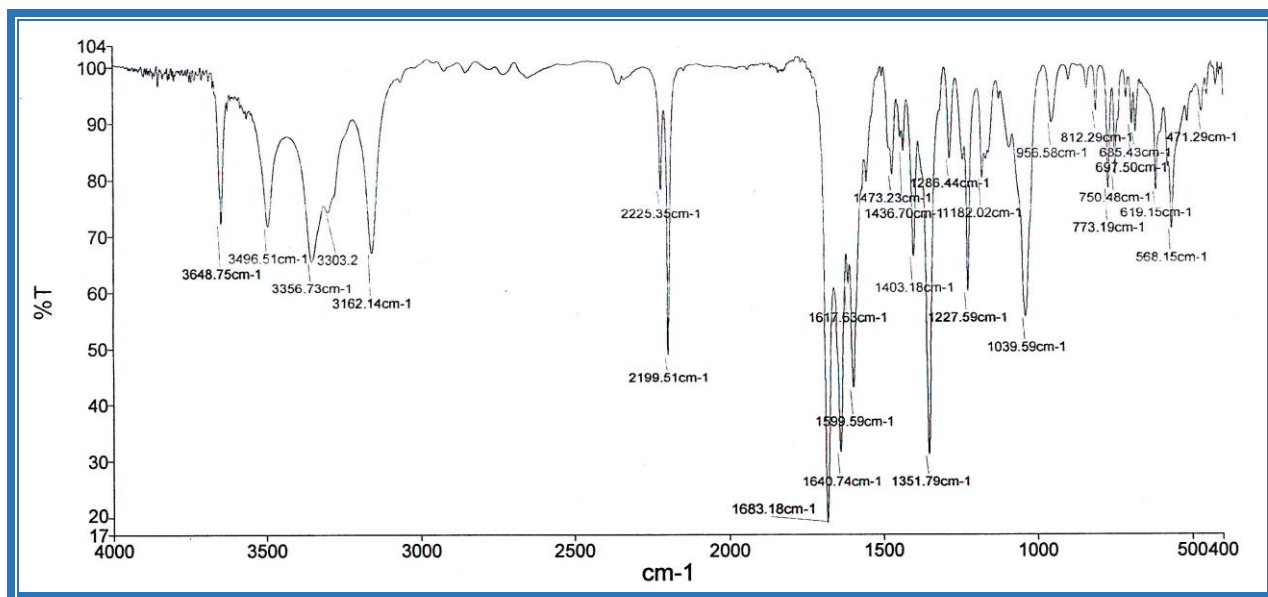

**Fig. K4** The IR spectrum of product (C<sub>11</sub>)
